# Supplementary material for: Metal-free C–N bond formations: one-pot synthesis of pyrido[2′,1′:2,3]imidazo[4,5-c]cinnolines, benzo[4′,5']thiazolo- and thiazolo[2′,3′:2,3]imidazo[4,5-c]cinnolines
Source: Royal Society of Chemistry journal article supplement (doi:10.1039/c6ra15418b), 2016-01-01
Supplement: c6ra15418b1.pdf [file c6ra15418b1.pdf]

### Supporting Information

## Metal-free C-N bond formations: One-pot Synthesis of pyrido[2',1':2,3]imidazo[4,5-c]cinnolines, benzo[4',5']thiazolo- and thiazolo[2',3':2,3]imidazo[4,5-c]cinnolines

Satheeshkumar Reddy Kandimalla,<sup>a,b</sup> Gowravaram Sabitha<sup>a,b\*</sup>

<sup>a</sup>Natural Products Chemistry Division, CSIR-Indian Institute of Chemical Technology,  
Hyderabad 500007, India.

<sup>b</sup>Academy of Scientific and Innovative  
Research (AcSIR), New Delhi, India

E-mail: gowravaramsr@yahoo.com, sabitha@iict.res.in; Fax: +91-40-27160512

---

### Table of Contents

|                                                                                                          |         |
|----------------------------------------------------------------------------------------------------------|---------|
| I. Copies of <sup>1</sup> H and <sup>13</sup> C NMR spectra of <b>2a-2c</b> .....                        | S2-S4   |
| II. Copies of <sup>1</sup> H and <sup>13</sup> C NMR spectra of <b>3a-3s</b> .....                       | S5-S23  |
| III. Copies of <sup>1</sup> H and <sup>13</sup> C NMR spectra of <b>4a, 4c, 4f &amp; 4h</b> .....        | S24-S27 |
| IV. Copies of <sup>1</sup> H and <sup>13</sup> C NMR spectra of <b>1t, 1u, 4t, 4u, 3t &amp; 3u</b> ..... | S28-S33 |
| V. Copies of <sup>1</sup> H and <sup>13</sup> C NMR spectra of <b>5a-5e</b> .....                        | S34-S38 |
| VI. Copies of <sup>1</sup> H and <sup>13</sup> C NMR spectra of <b>6a-6e</b> .....                       | S39-S43 |

# I. Copies of $^1\text{H}$ and $^{13}\text{C}$ NMR spectra of 2a-2c

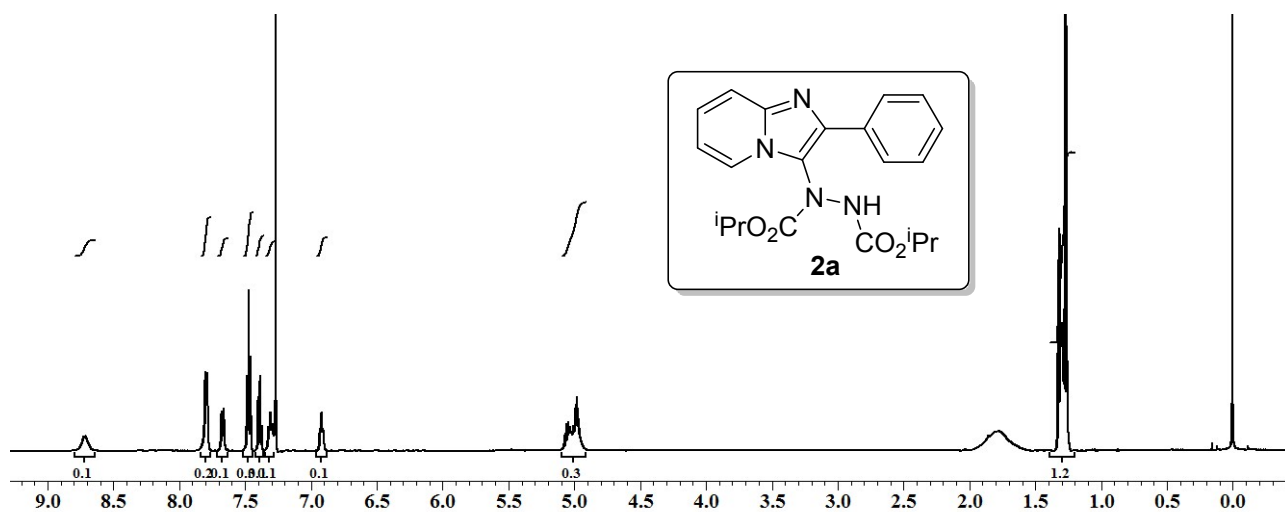

$^1\text{H}$  NMR of 2a (500 MHz,  $\text{CDCl}_3$ )

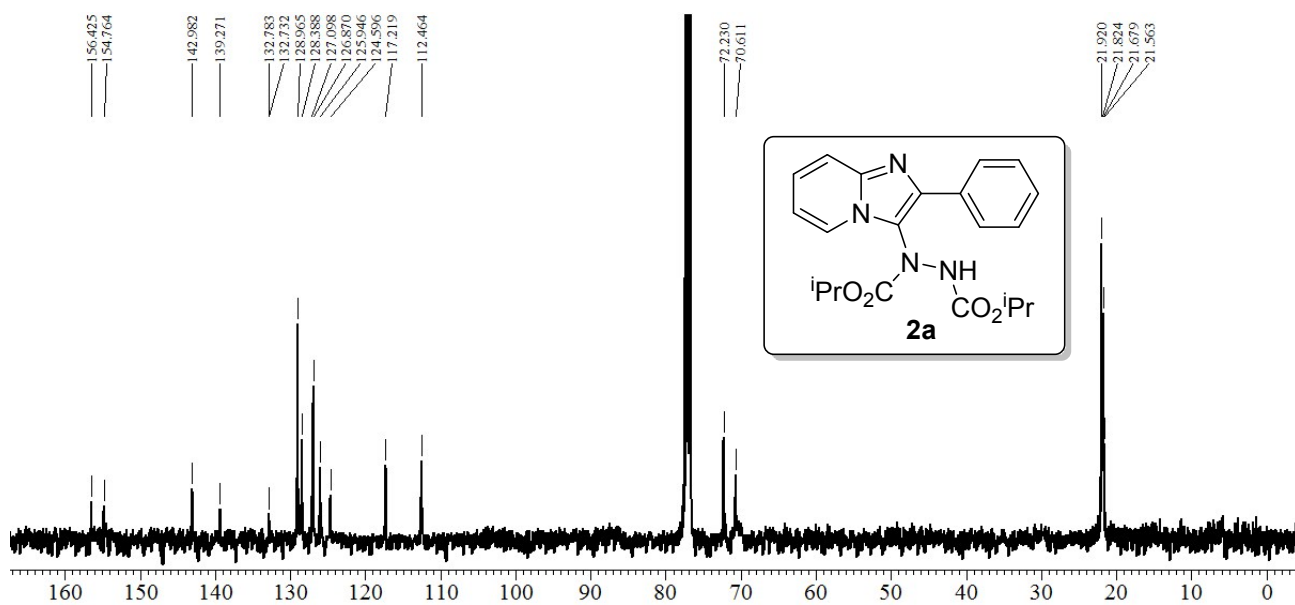

$^{13}\text{C}$  NMR of 2a (100 MHz,  $\text{CDCl}_3$ )

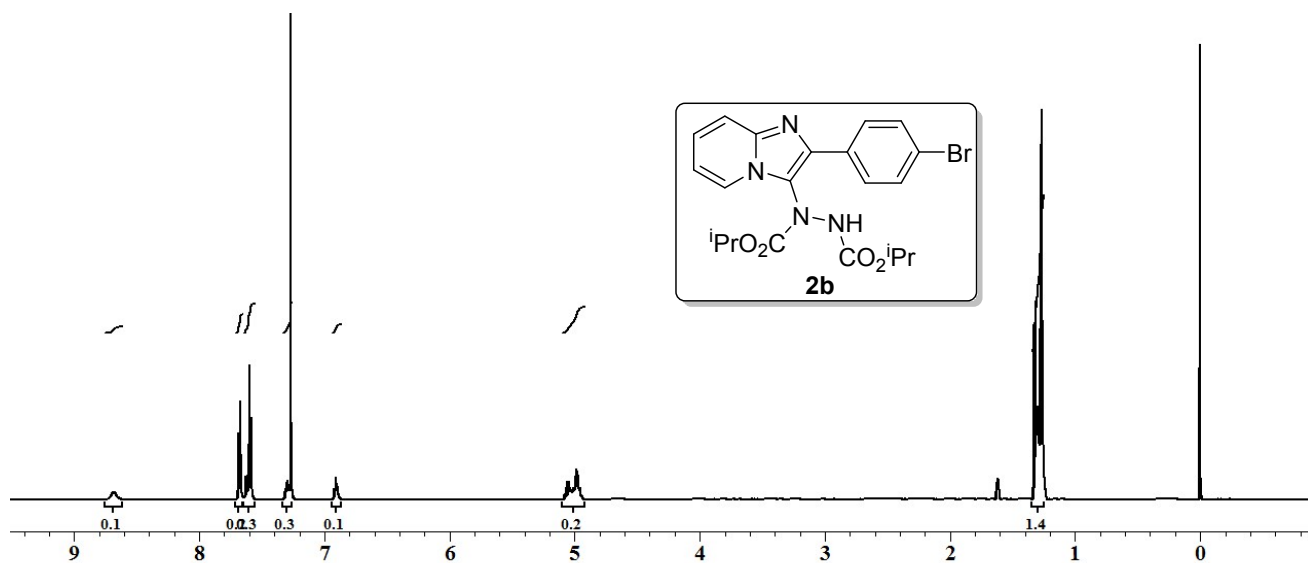

<sup>1</sup>H NMR of **2b** (500 MHz, CDCl<sub>3</sub>)

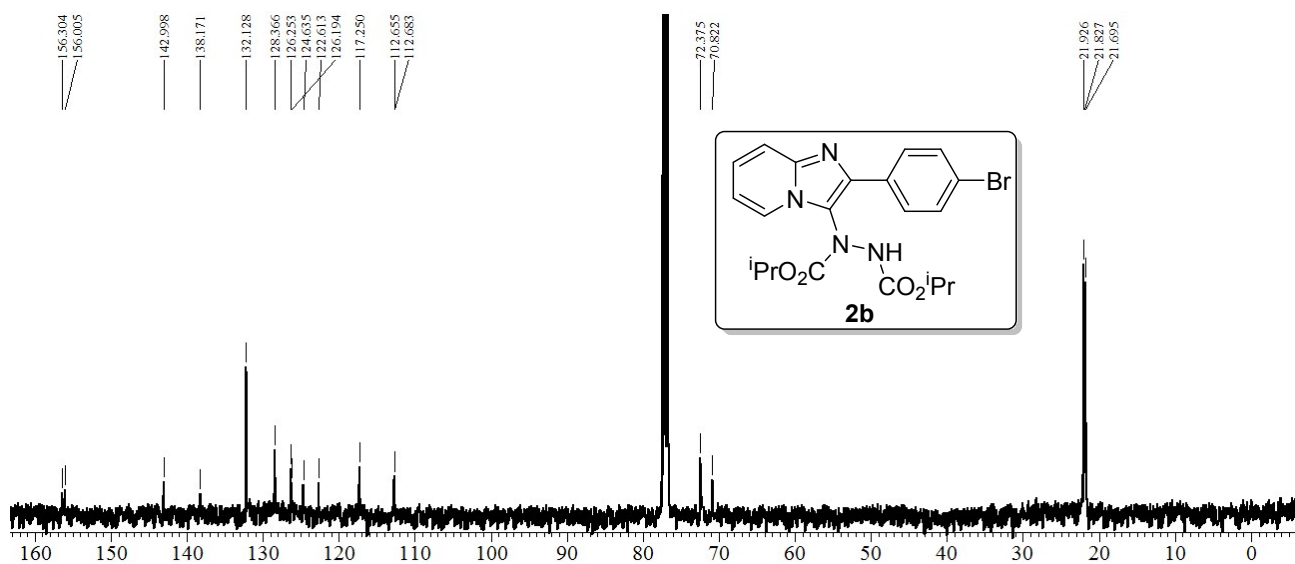

<sup>13</sup>C NMR of **2b** (100 MHz, CDCl<sub>3</sub>)

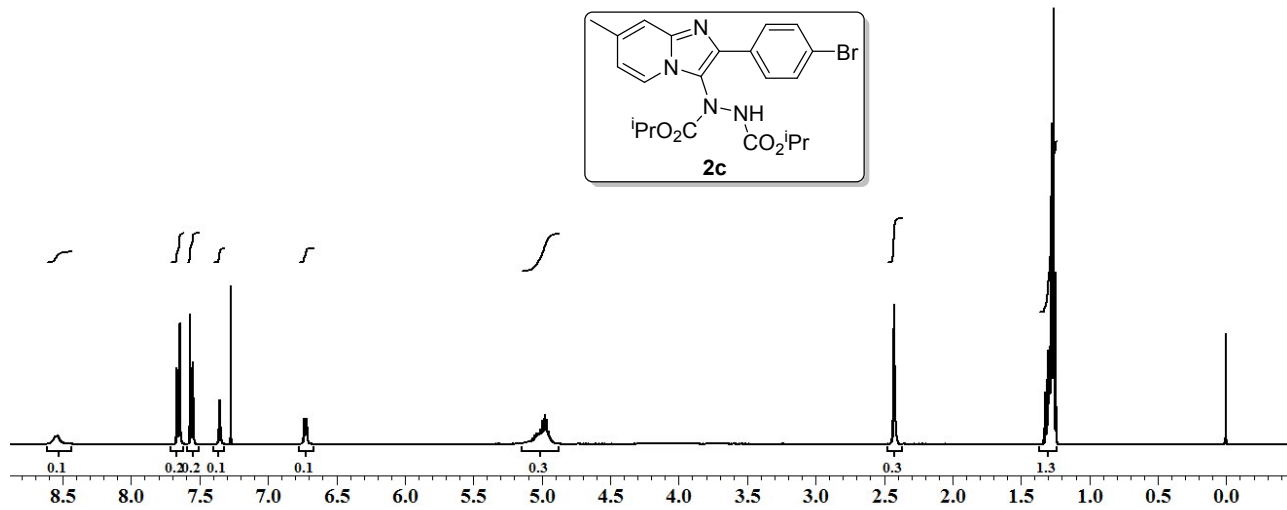

**<sup>1</sup>H NMR of 2c (500 MHz, CDCl<sub>3</sub>)**

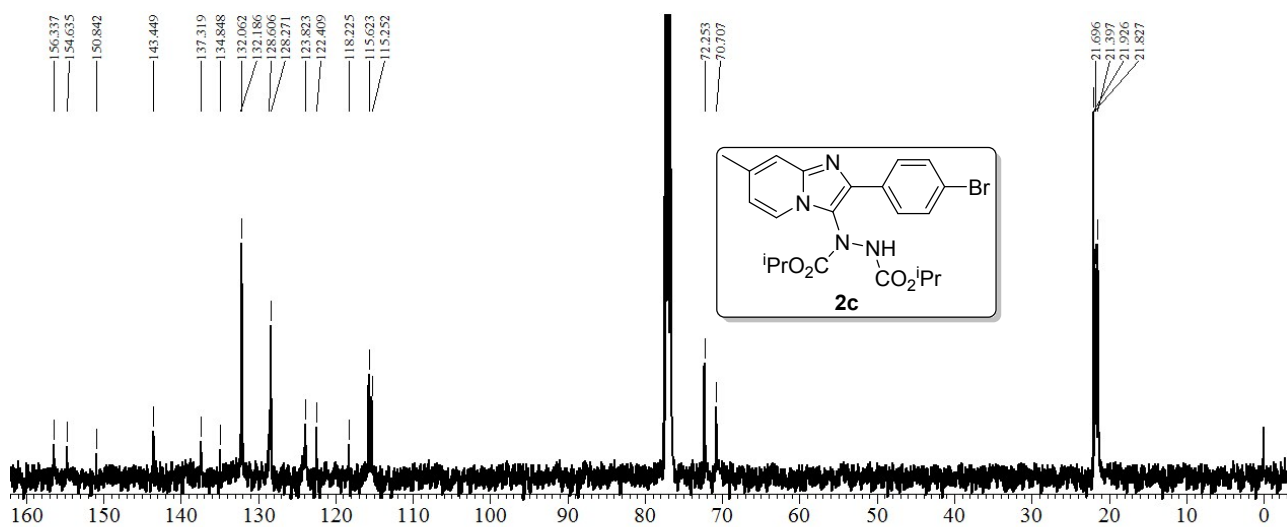

**<sup>13</sup>C NMR of 2c (100 MHz, CDCl<sub>3</sub>)**

## II. Copies of $^1\text{H}$ and $^{13}\text{C}$ NMR spectra of 3a-3s

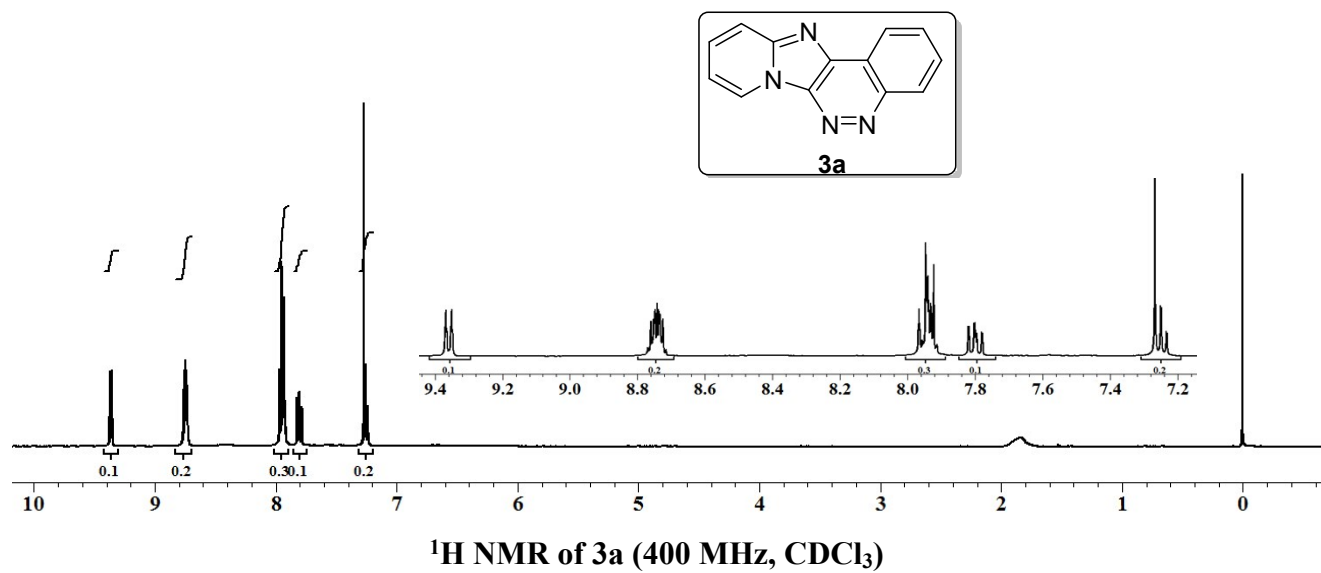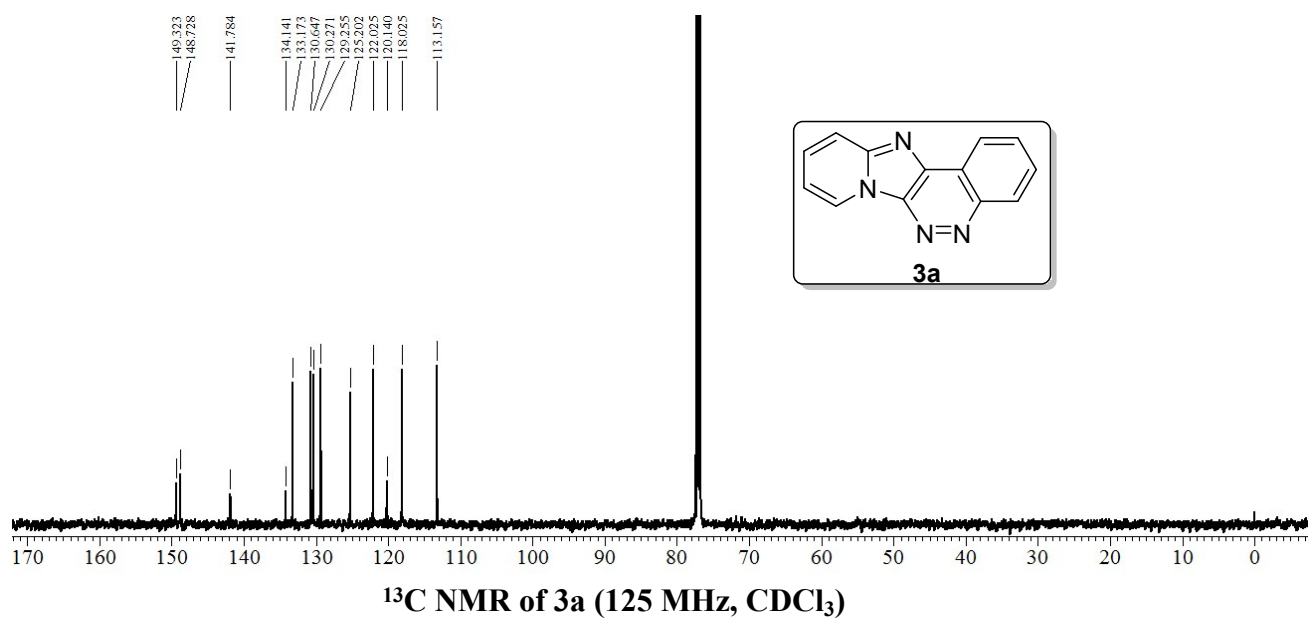

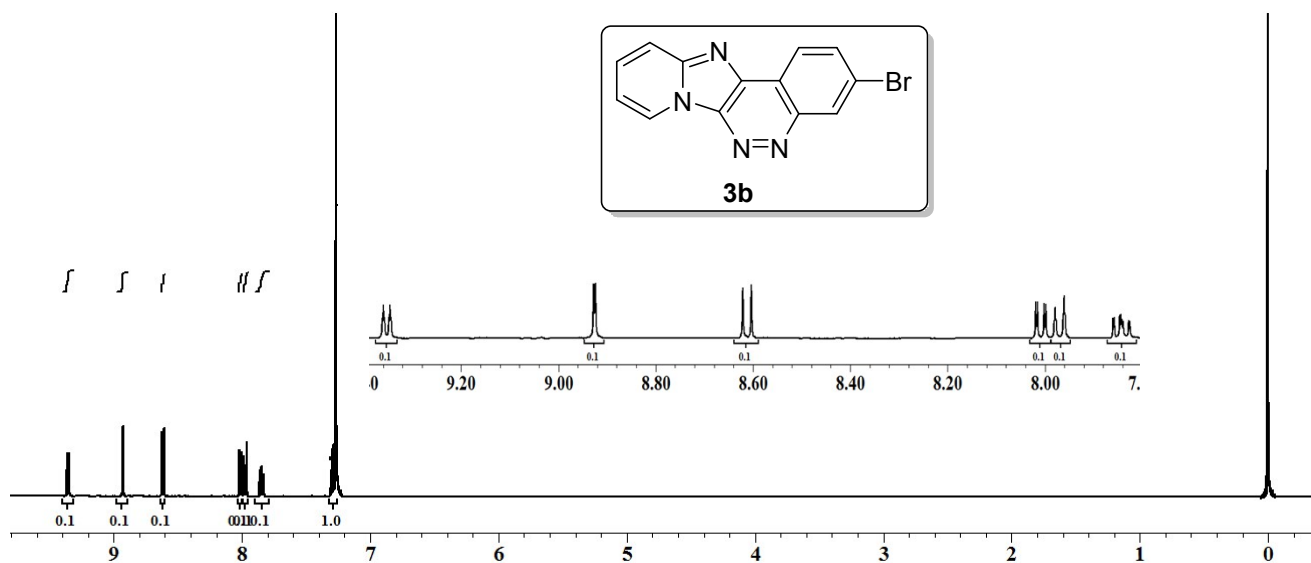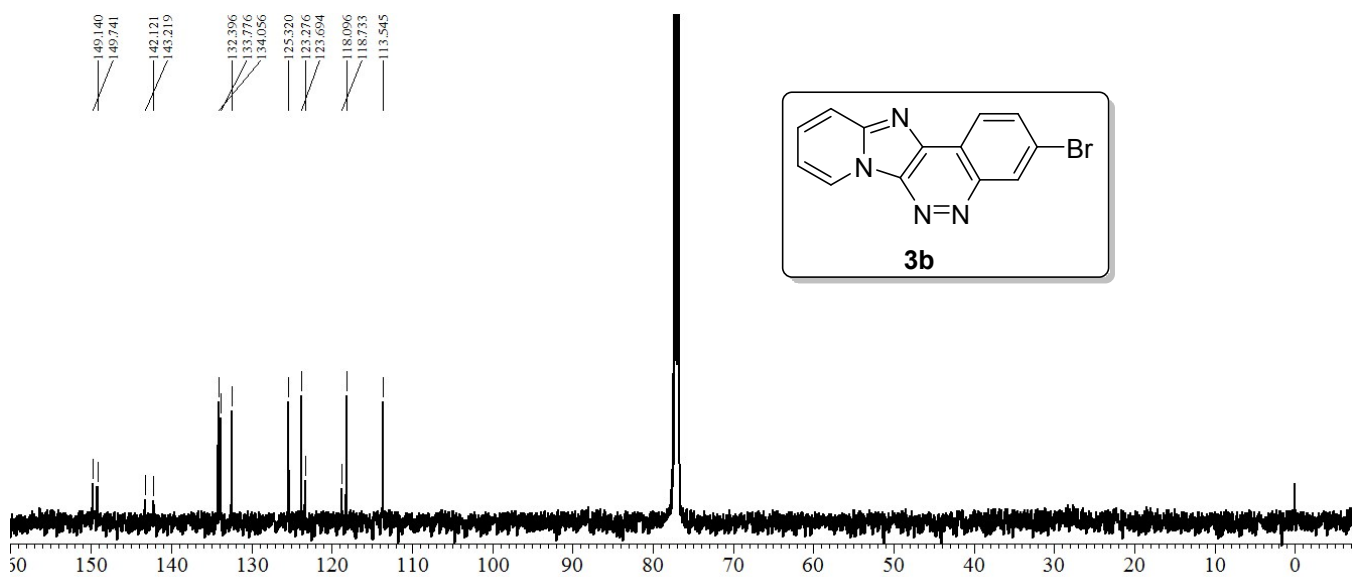

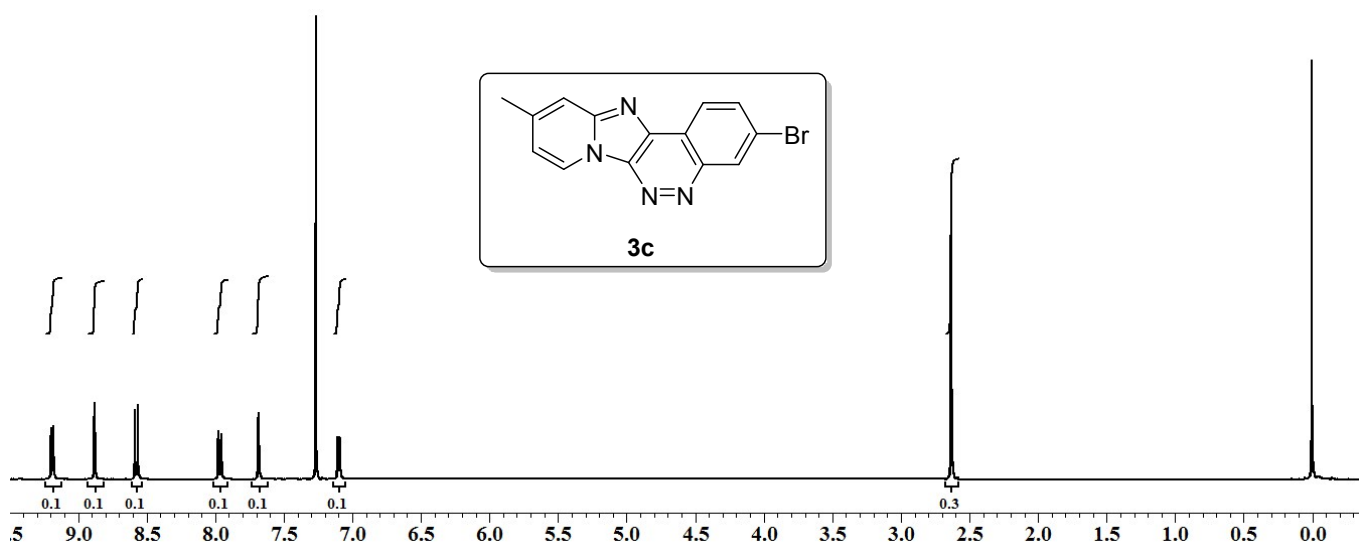

$^1\text{H}$  NMR of **3c** (500 MHz,  $\text{CDCl}_3$ )

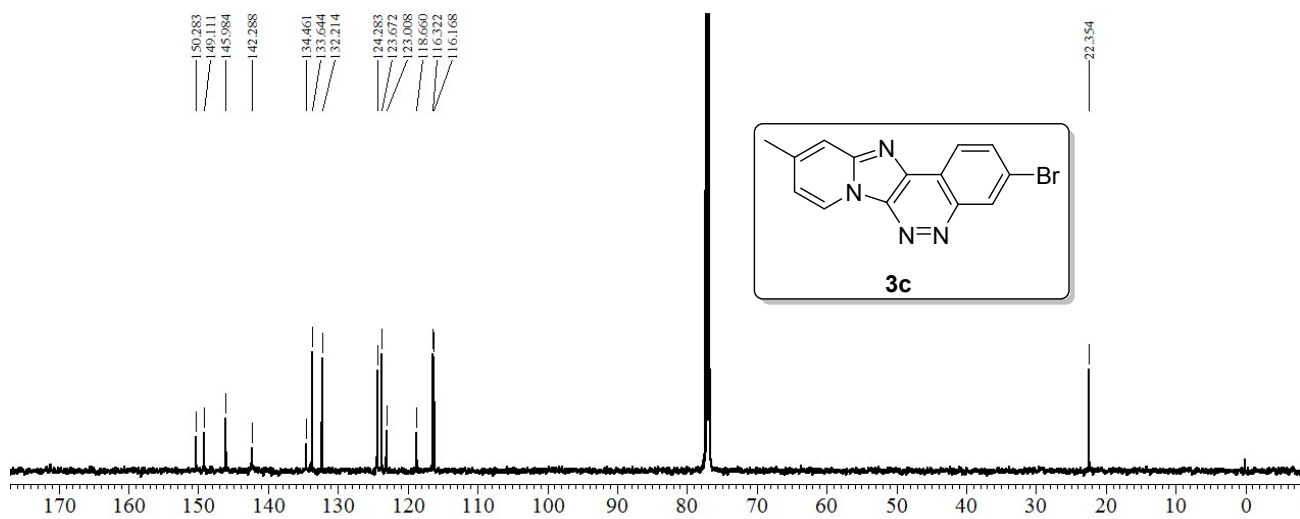

$^{13}\text{C}$  NMR of **3c** (125 MHz,  $\text{CDCl}_3$ )

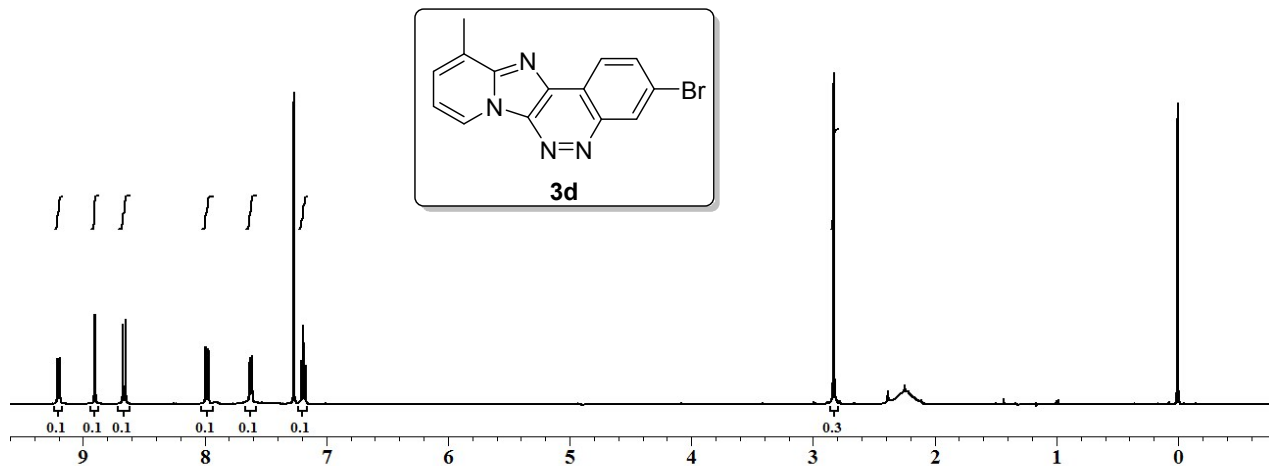

$^1\text{H NMR}$  of **3d** (400 MHz,  $\text{CDCl}_3$ )

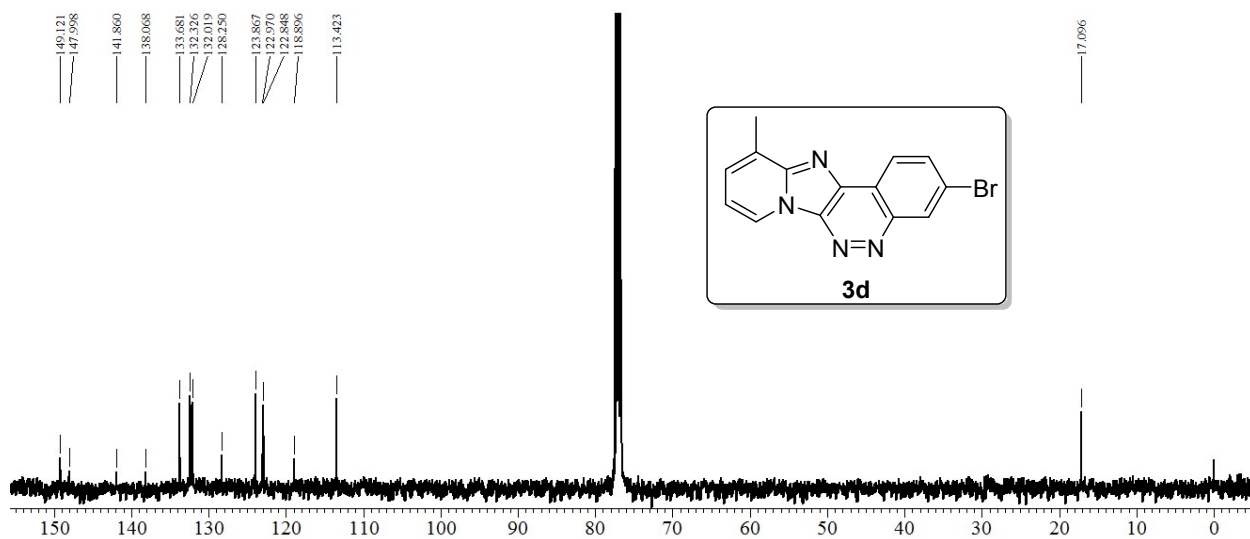

$^{13}\text{C NMR}$  of **3d** (100 MHz,  $\text{CDCl}_3$ )



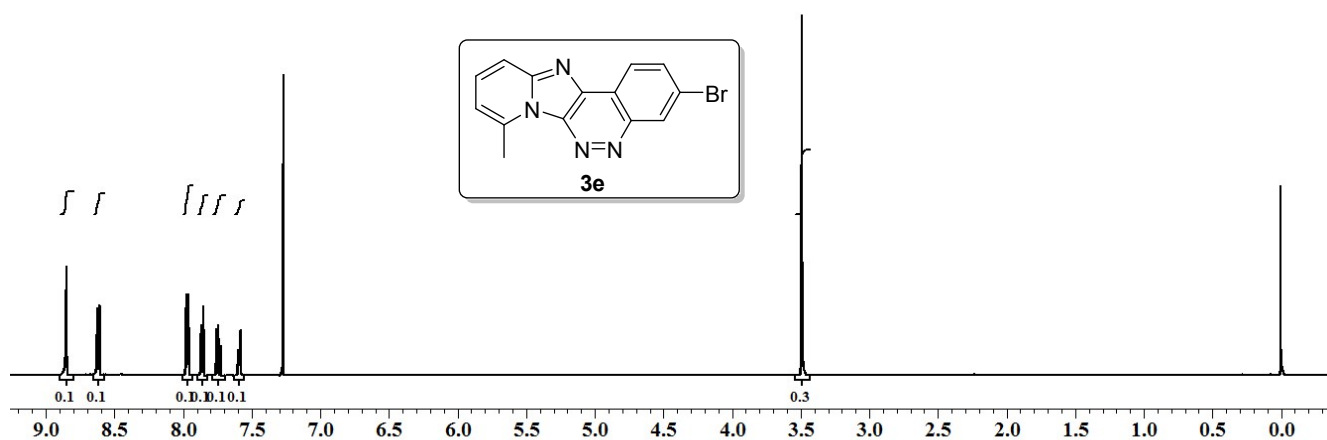

<sup>1</sup>H NMR of **3e** (500 MHz, CDCl<sub>3</sub>)

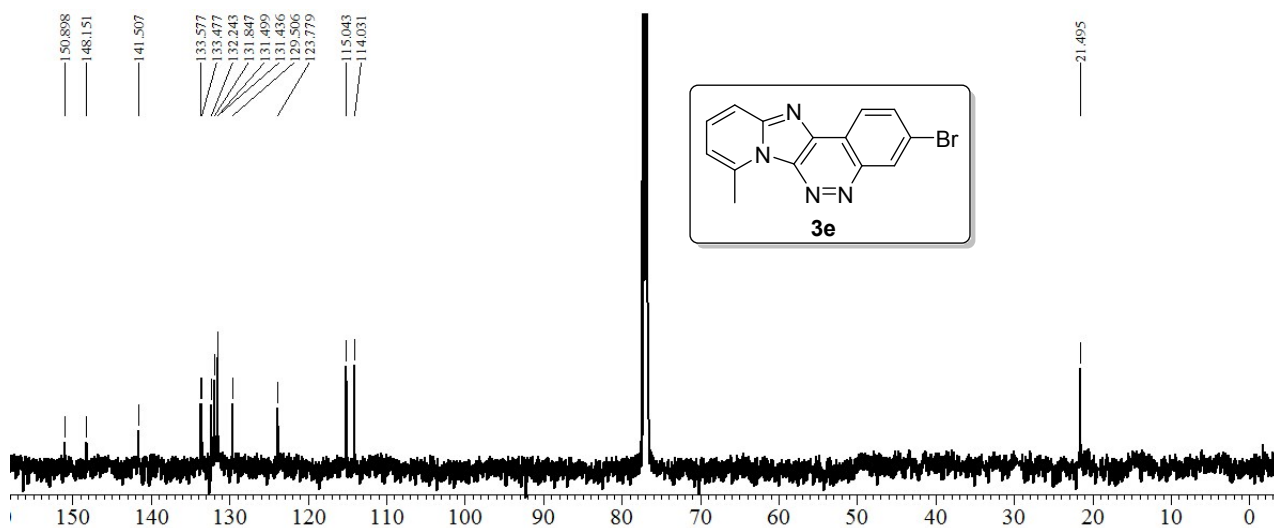

<sup>13</sup>C NMR of **3e** (125 MHz, CDCl<sub>3</sub>)

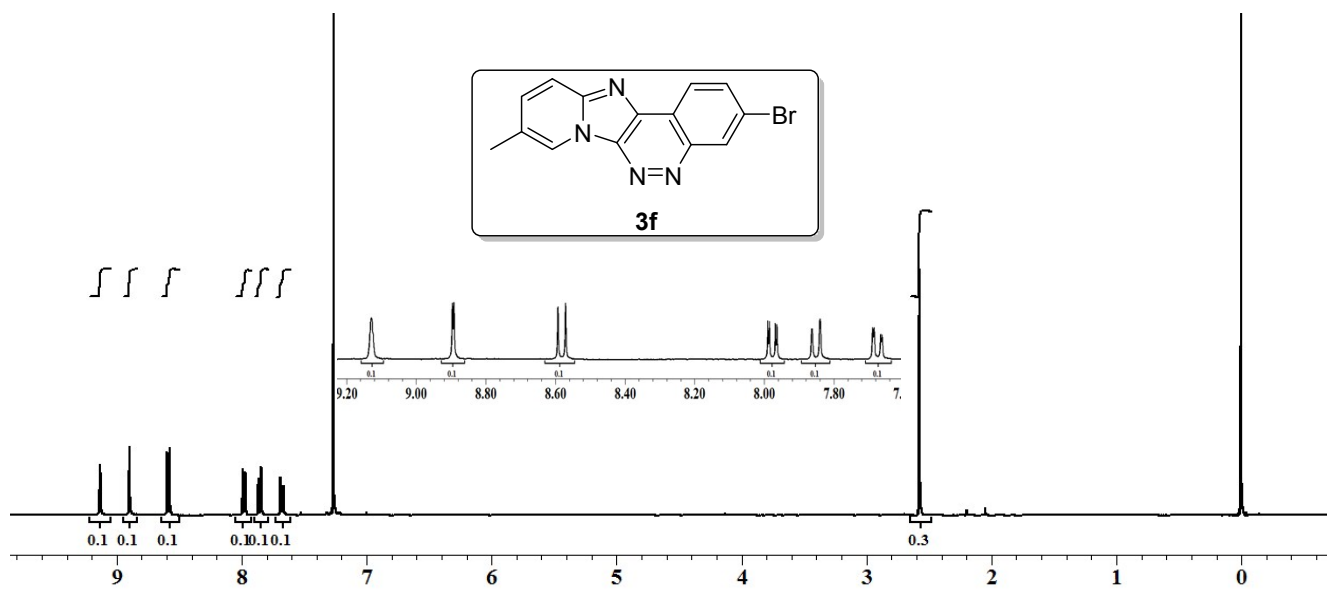

<sup>1</sup>H NMR of **3f** (400 MHz, CDCl<sub>3</sub>)

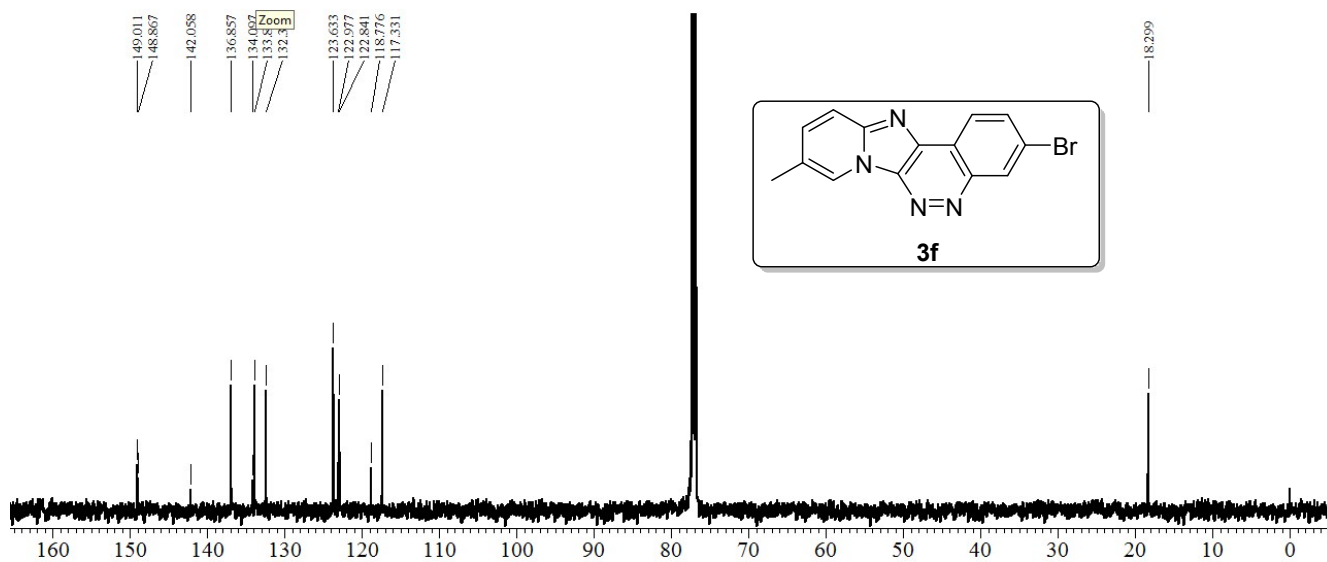

<sup>13</sup>C NMR of **3f** (125 MHz, CDCl<sub>3</sub>)

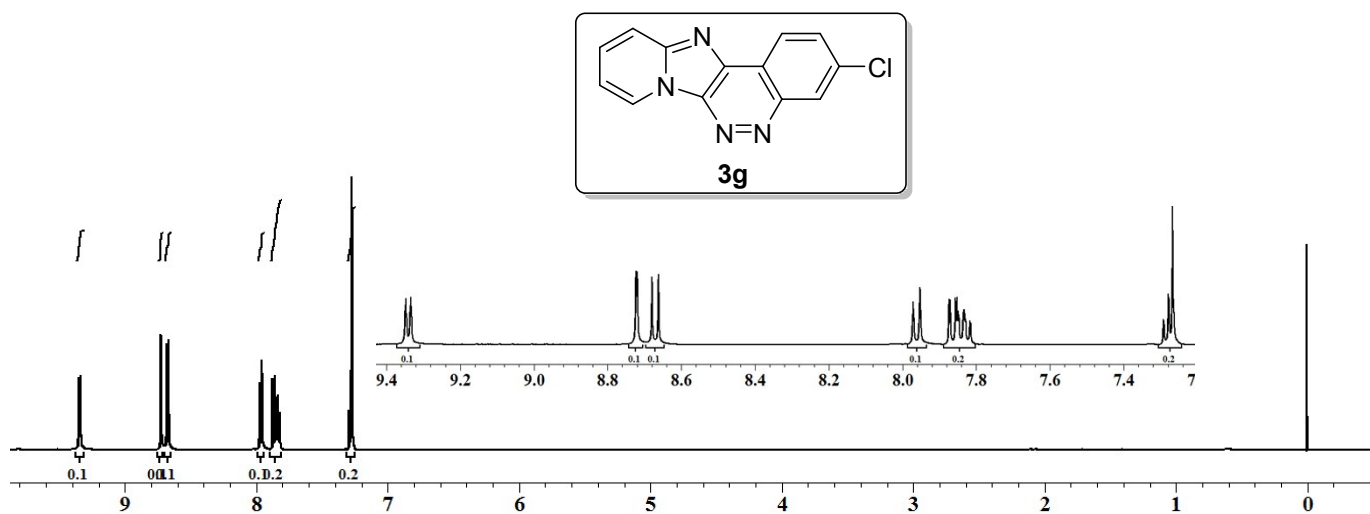

**<sup>1</sup>H NMR of 3g (500 MHz, CDCl<sub>3</sub>)**

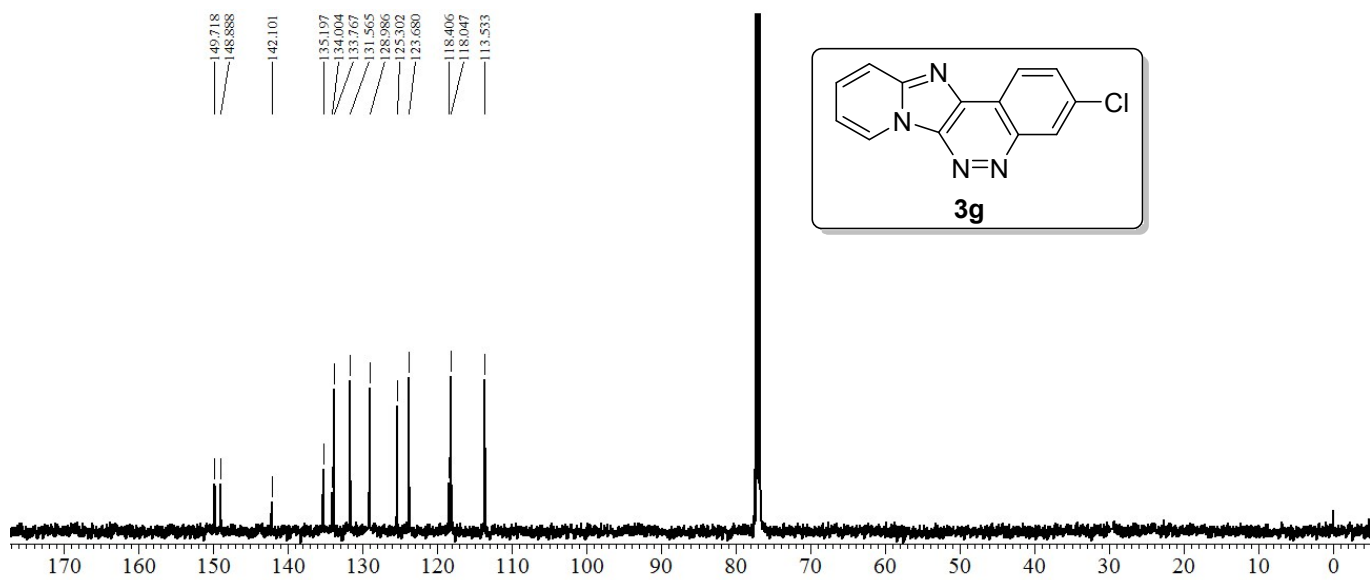

**<sup>13</sup>C NMR of 3g (125 MHz, CDCl<sub>3</sub>)**

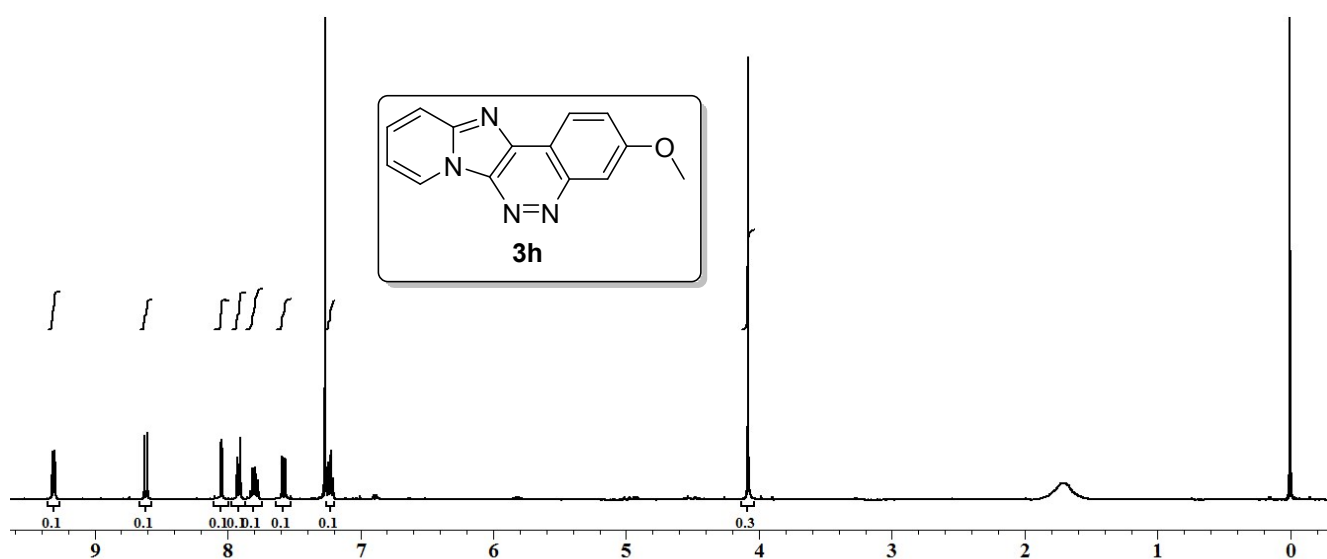

<sup>1</sup>H NMR of **3h** (400 MHz, CDCl<sub>3</sub>)

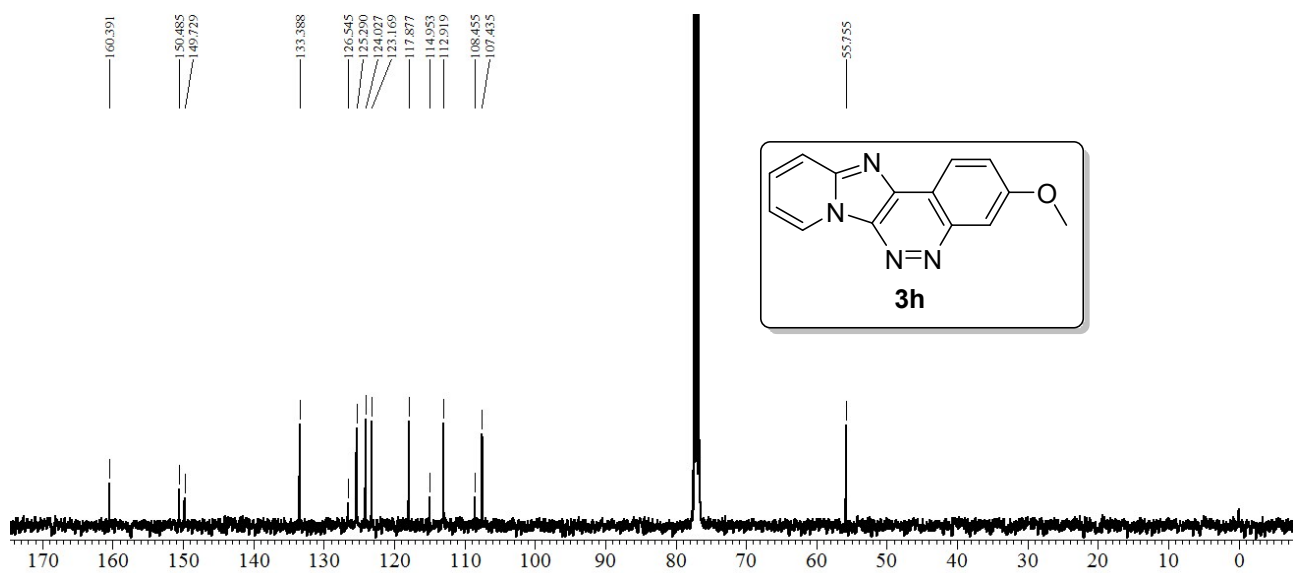

<sup>13</sup>C NMR of **3h** (100 MHz, CDCl<sub>3</sub>)

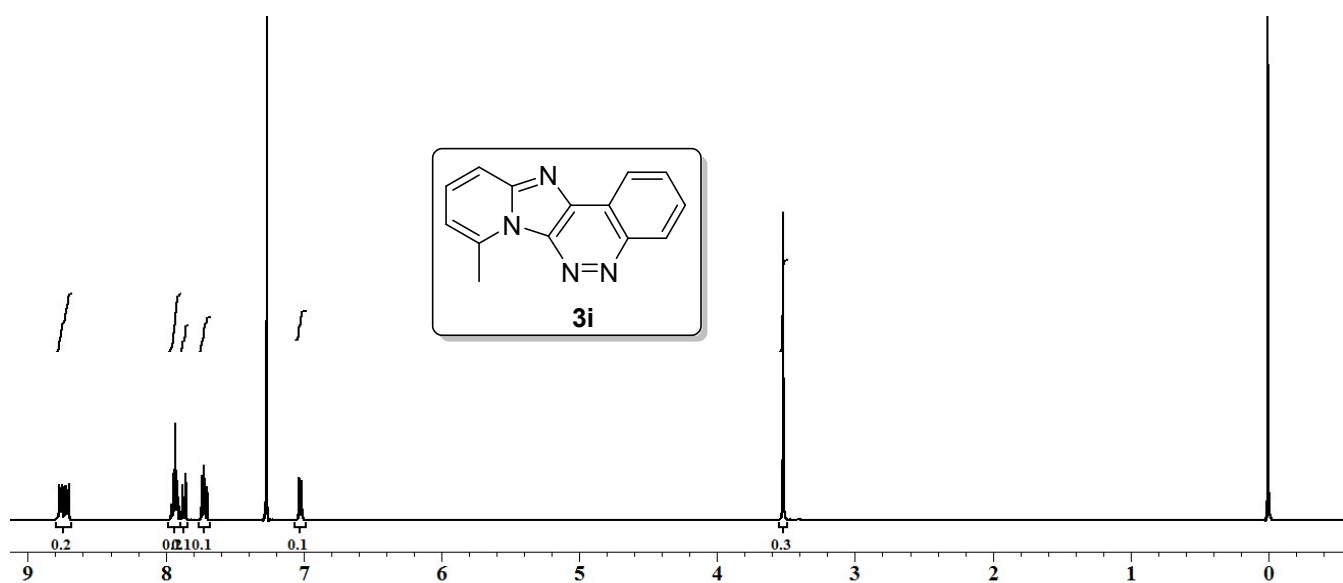

**<sup>1</sup>H NMR of 3i (400 MHz, CDCl<sub>3</sub>)**

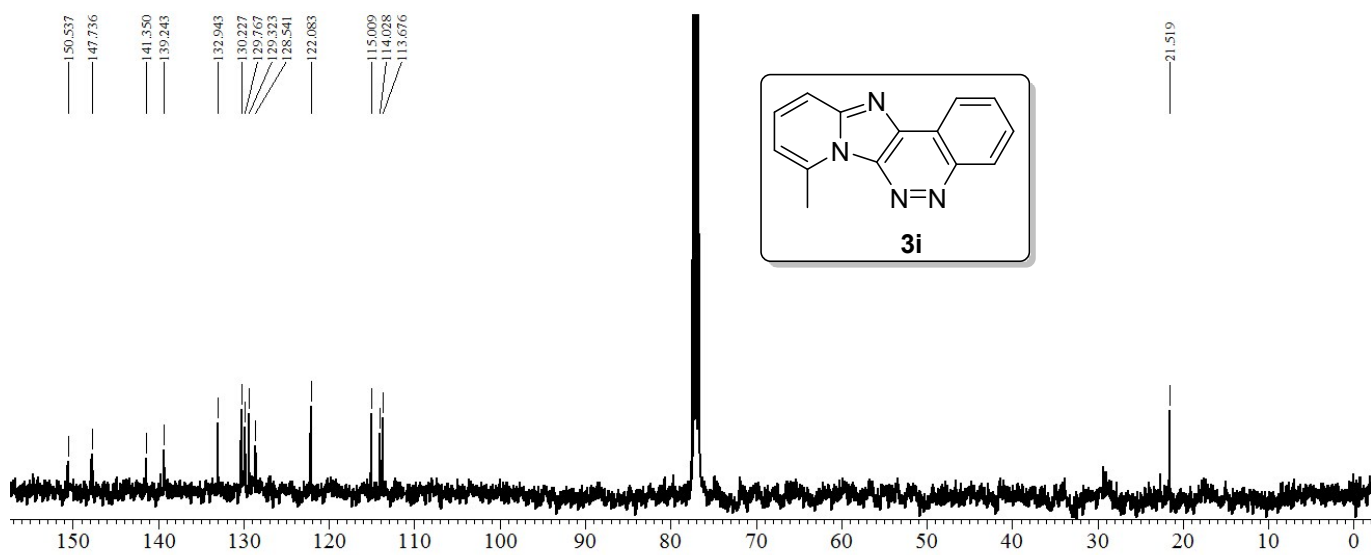

**<sup>13</sup>C NMR of 3i (100 MHz, CDCl<sub>3</sub>)**

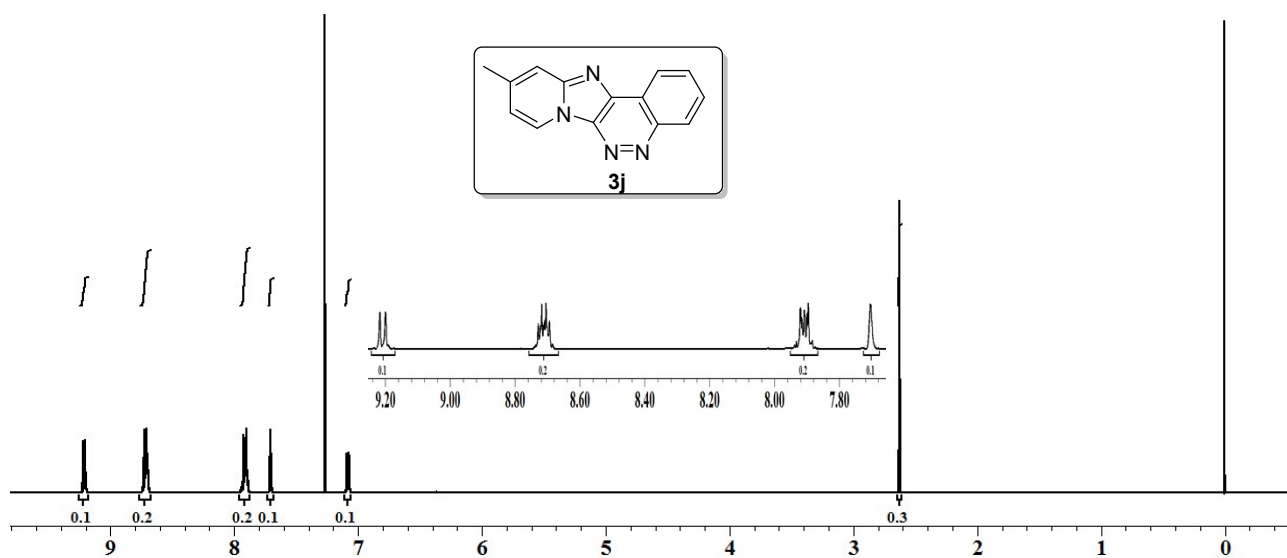

<sup>1</sup>H NMR of **3j** (400 MHz, CDCl<sub>3</sub>)

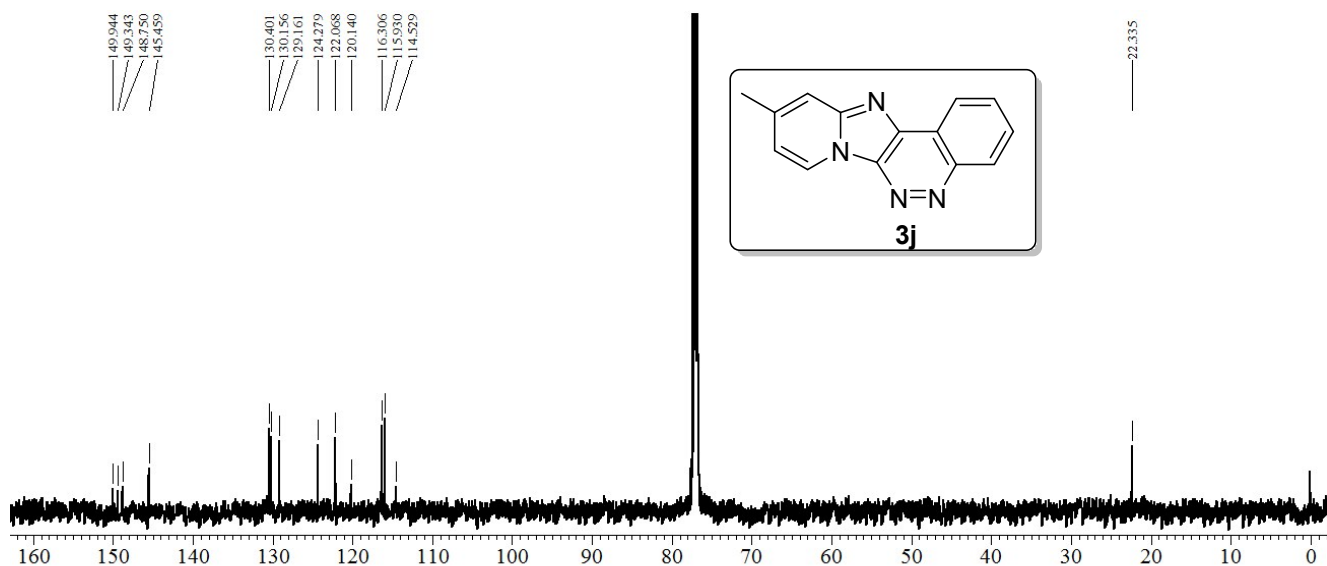

<sup>13</sup>C NMR of **3j** (125 MHz, CDCl<sub>3</sub>)

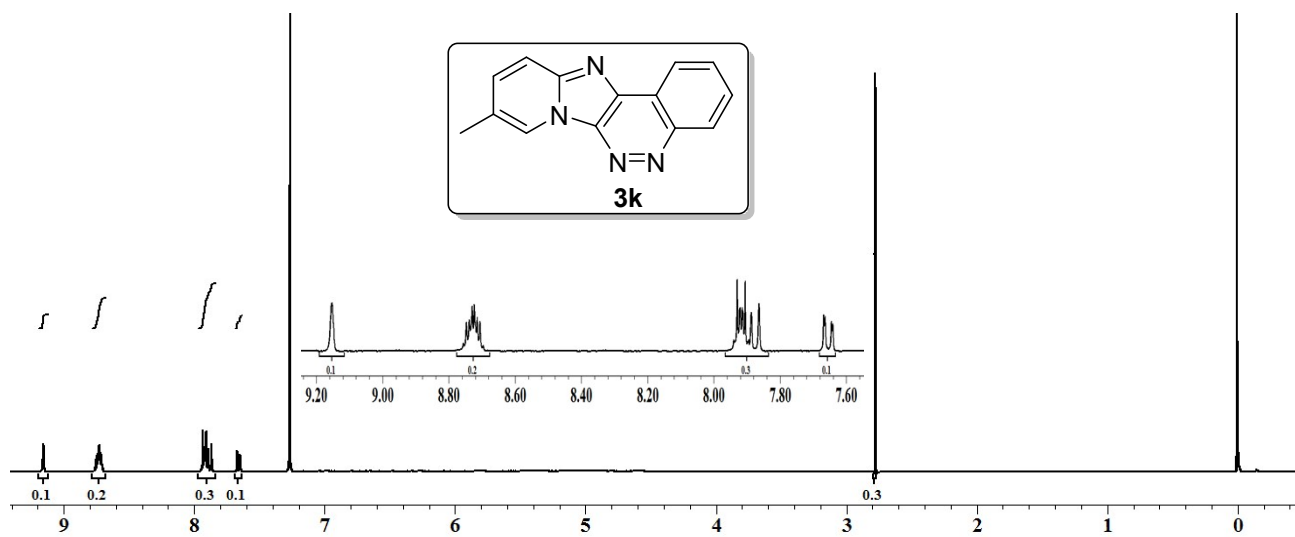

<sup>1</sup>H NMR of **3k** (400 MHz, CDCl<sub>3</sub>)

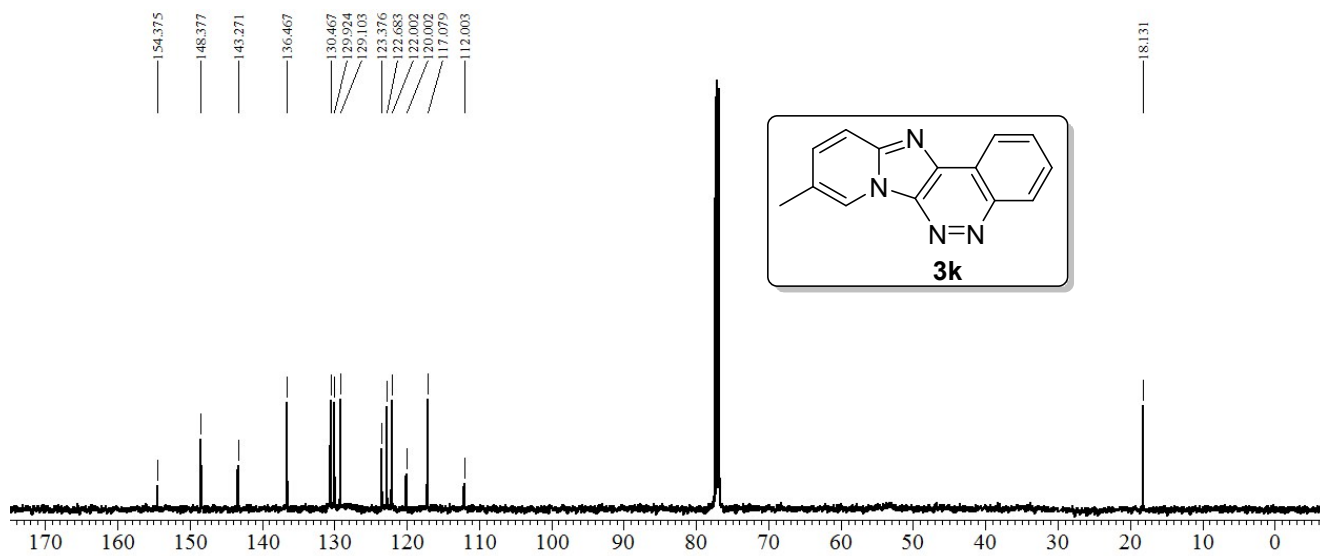

<sup>13</sup>C NMR of **3k** (125 MHz, CDCl<sub>3</sub>)

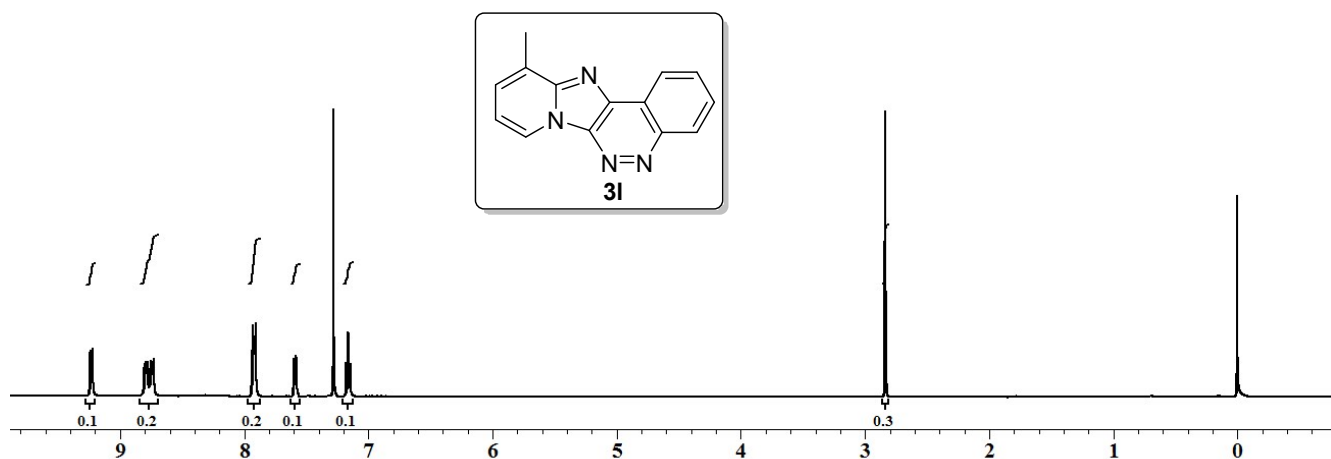

<sup>1</sup>H NMR of 3I (400 MHz, CDCl<sub>3</sub>)

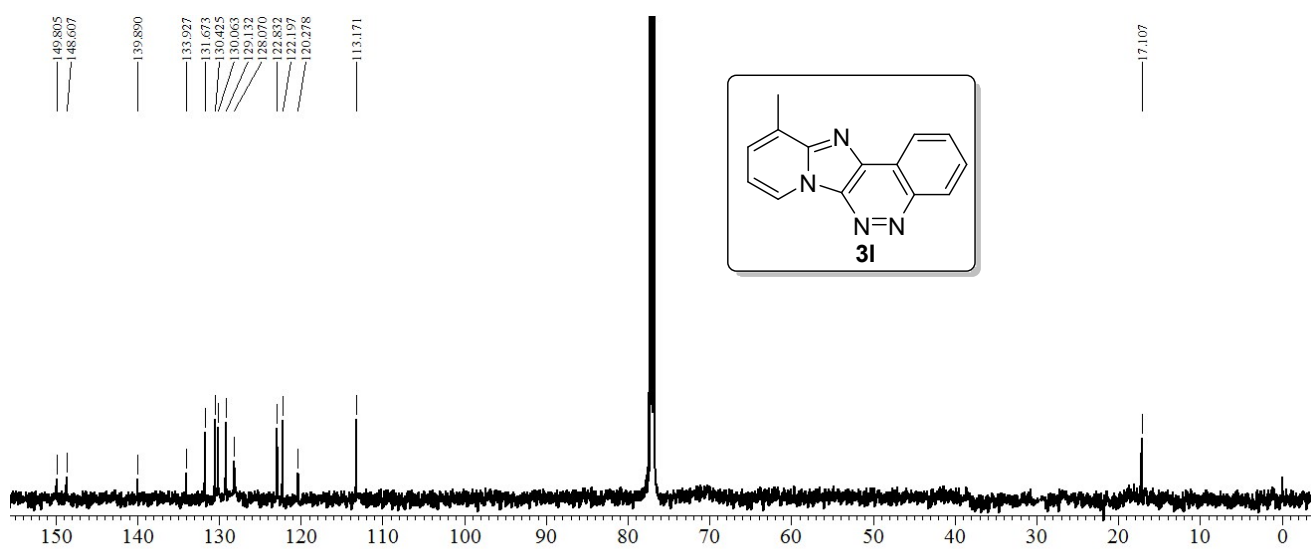

<sup>13</sup>C NMR of 3I (125 MHz, CDCl<sub>3</sub>)



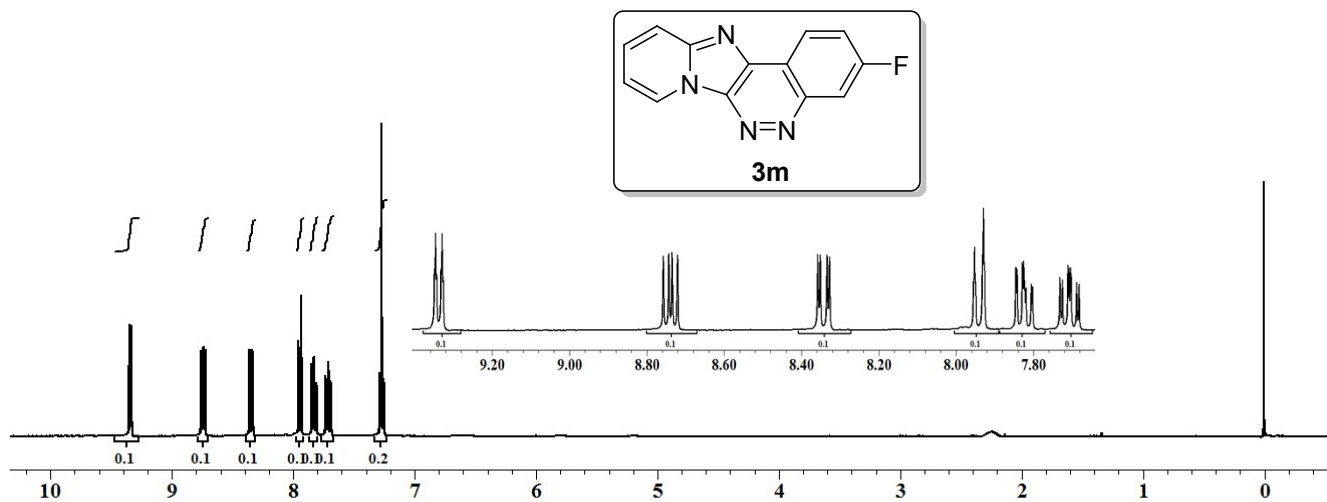

<sup>1</sup>H NMR of **3m** (400 MHz, CDCl<sub>3</sub>)

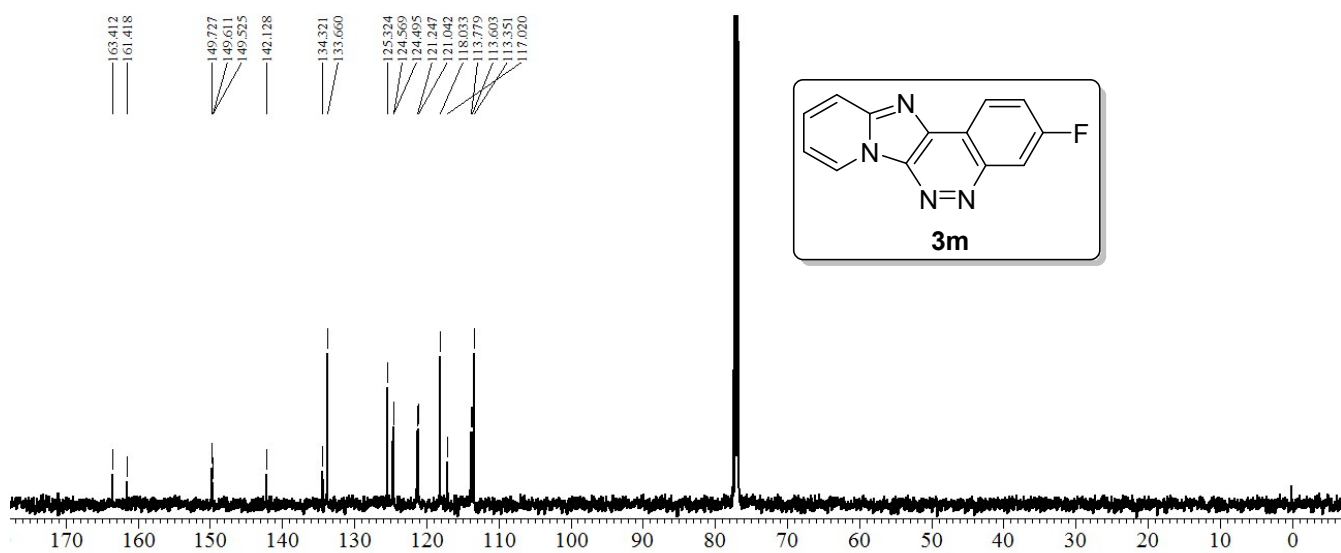

<sup>13</sup>C NMR of **3m** (125 MHz, CDCl<sub>3</sub>)

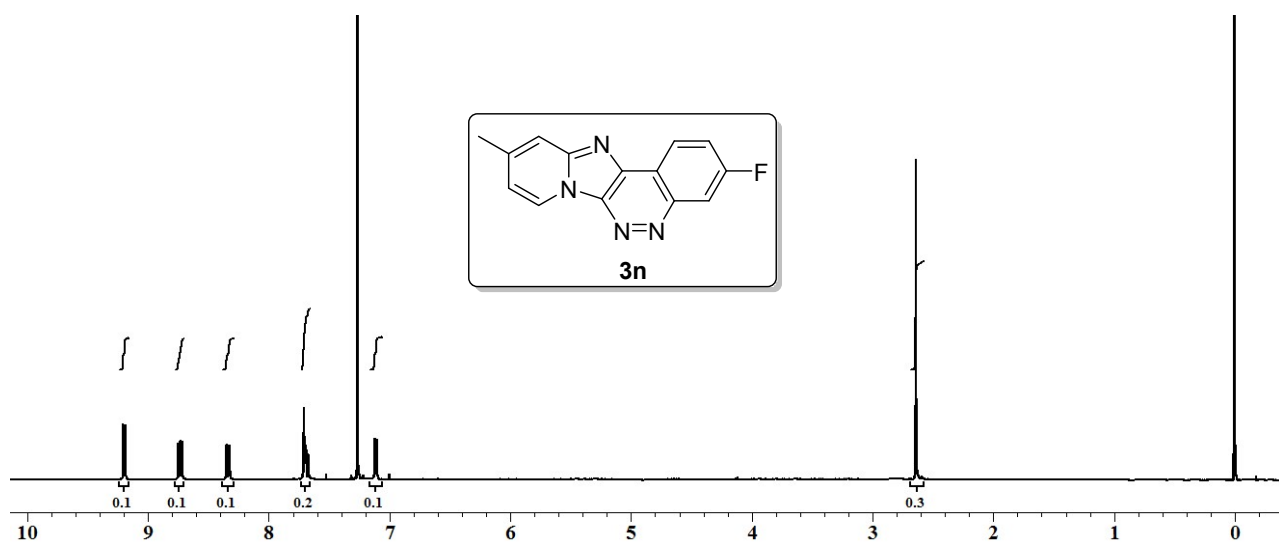

<sup>1</sup>H NMR of **3n** (400 MHz, CDCl<sub>3</sub>)

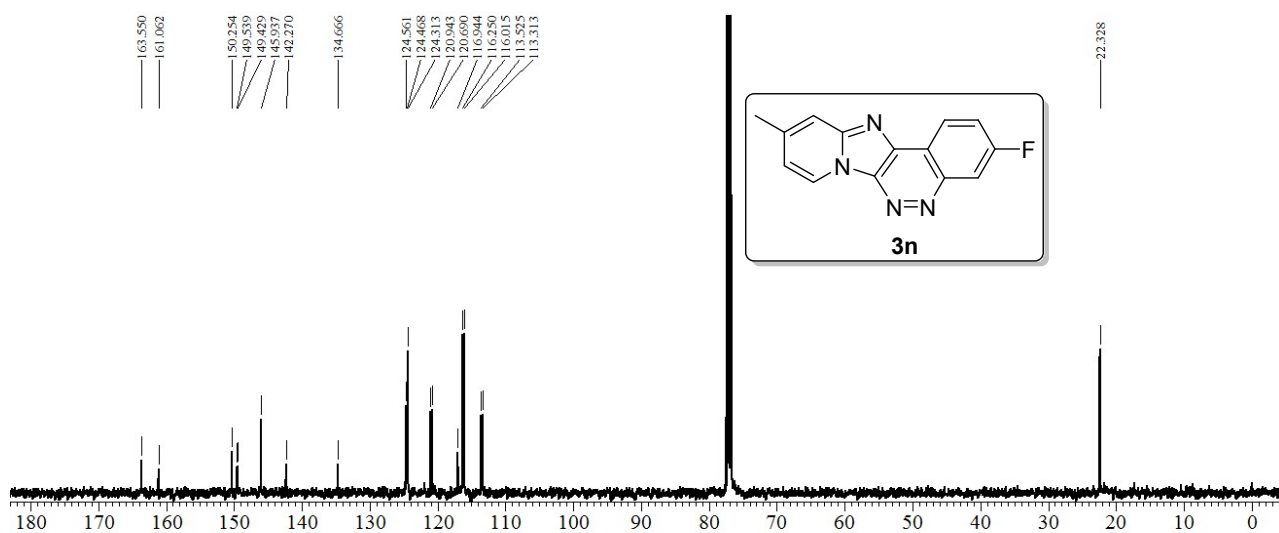

<sup>13</sup>C NMR of **3n** (125 MHz, CDCl<sub>3</sub>)

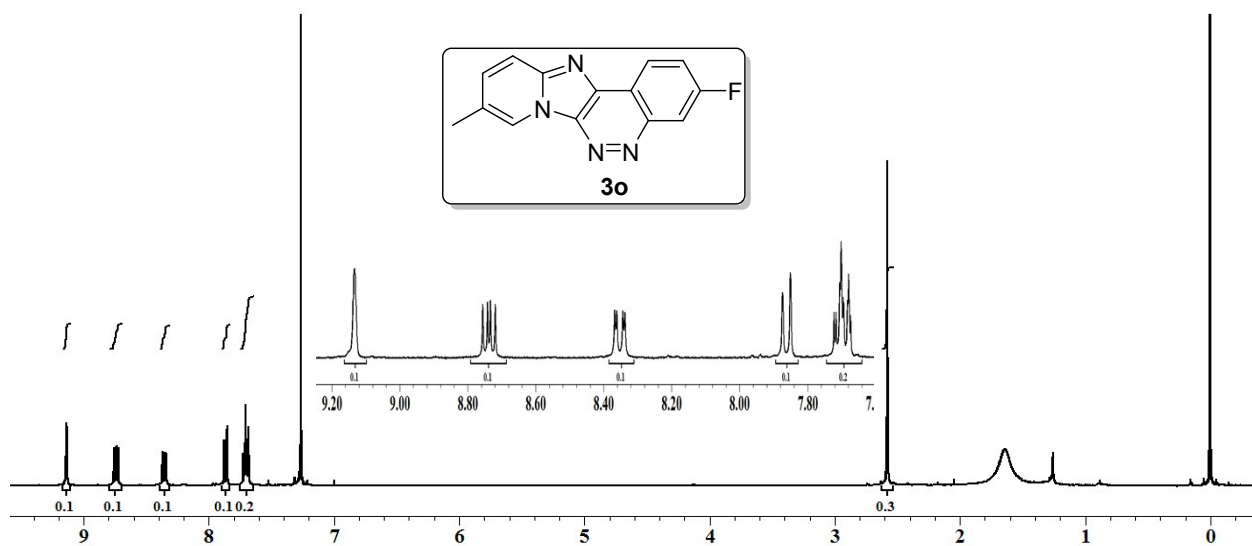

**$^1\text{H}$  NMR of 3o (400 MHz,  $\text{CDCl}_3$ )**

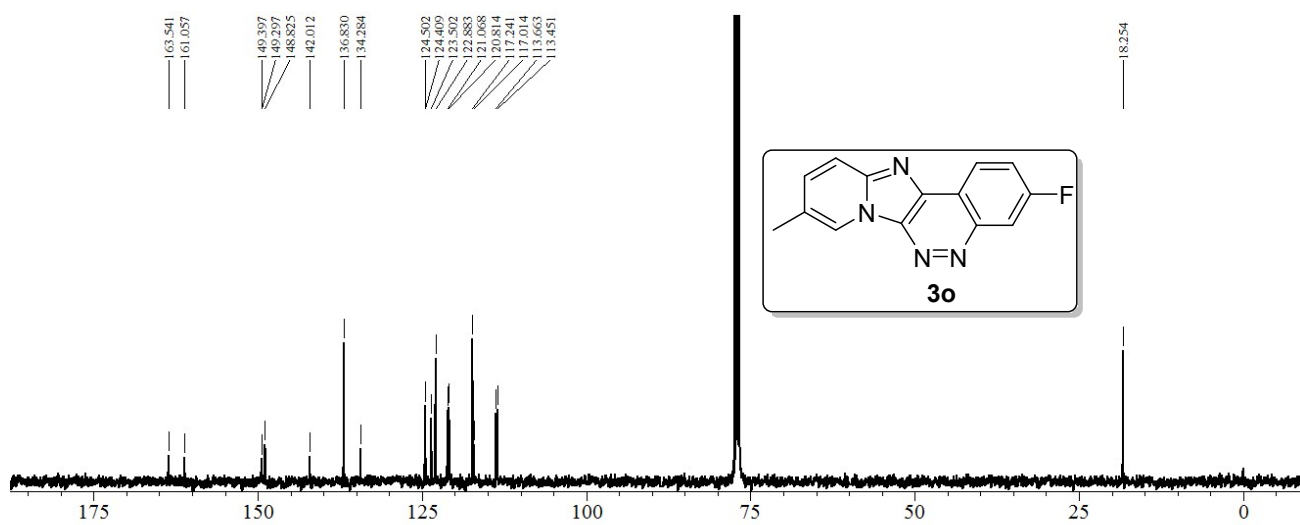

**$^{13}\text{C}$  NMR of 3o (125 MHz,  $\text{CDCl}_3$ )**



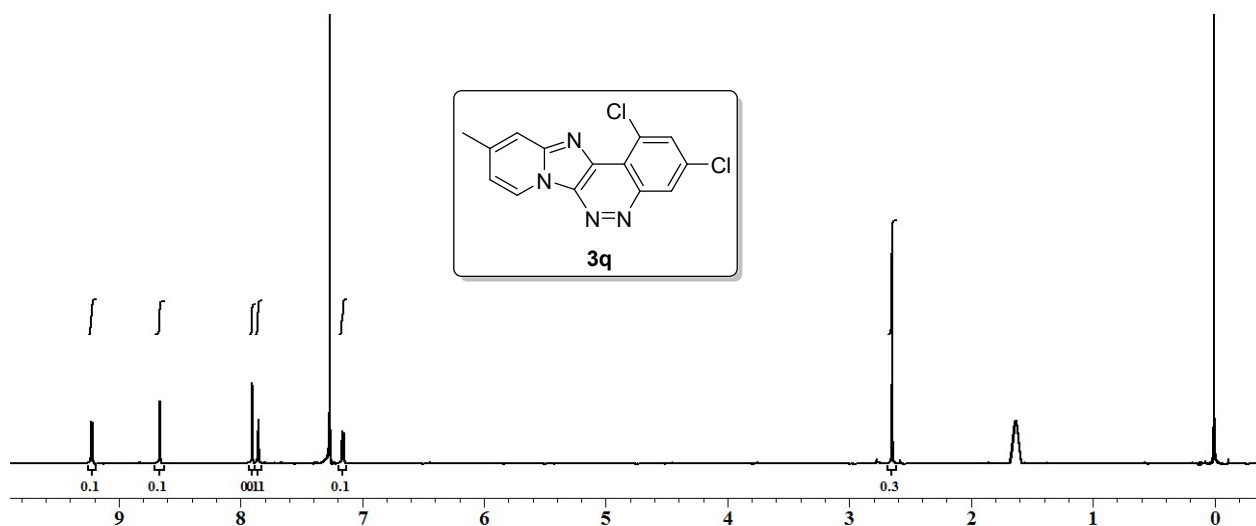

<sup>1</sup>H NMR of **3q** (500 MHz, CDCl<sub>3</sub>)

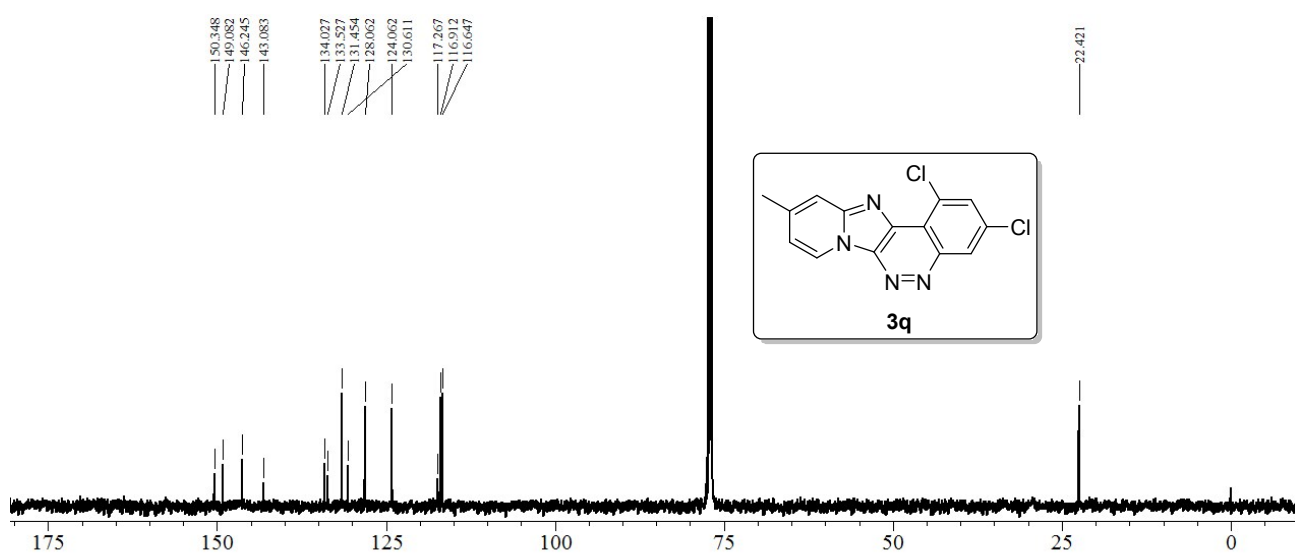

<sup>13</sup>C NMR of **3q** (125 MHz, CDCl<sub>3</sub>)



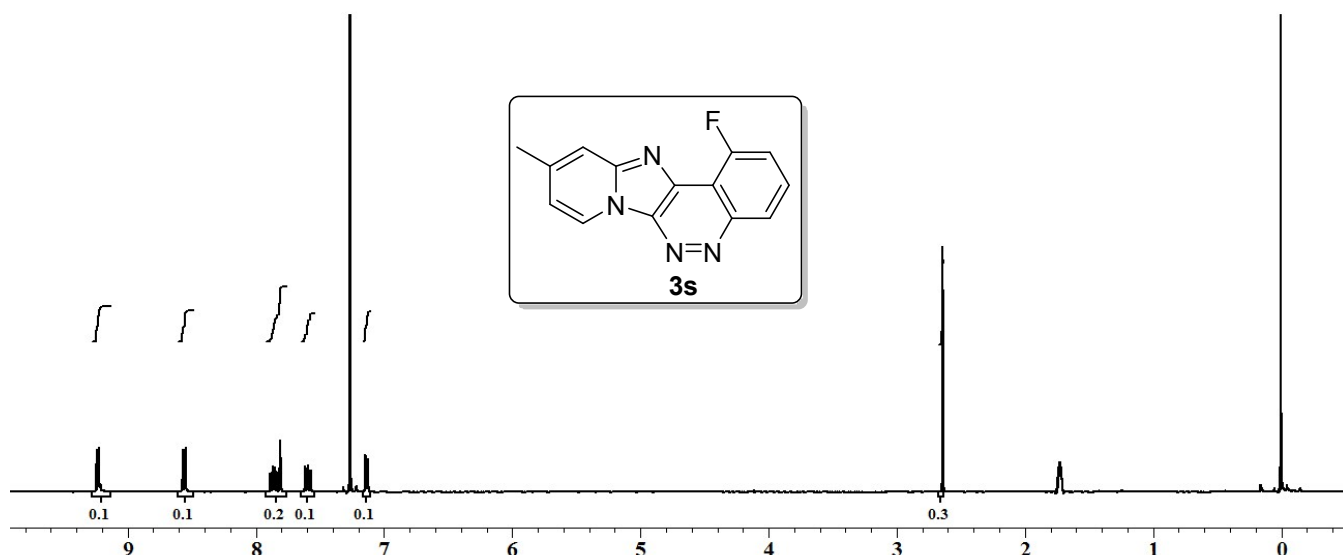

**<sup>1</sup>H NMR of 3s (400 MHz, CDCl<sub>3</sub>)**

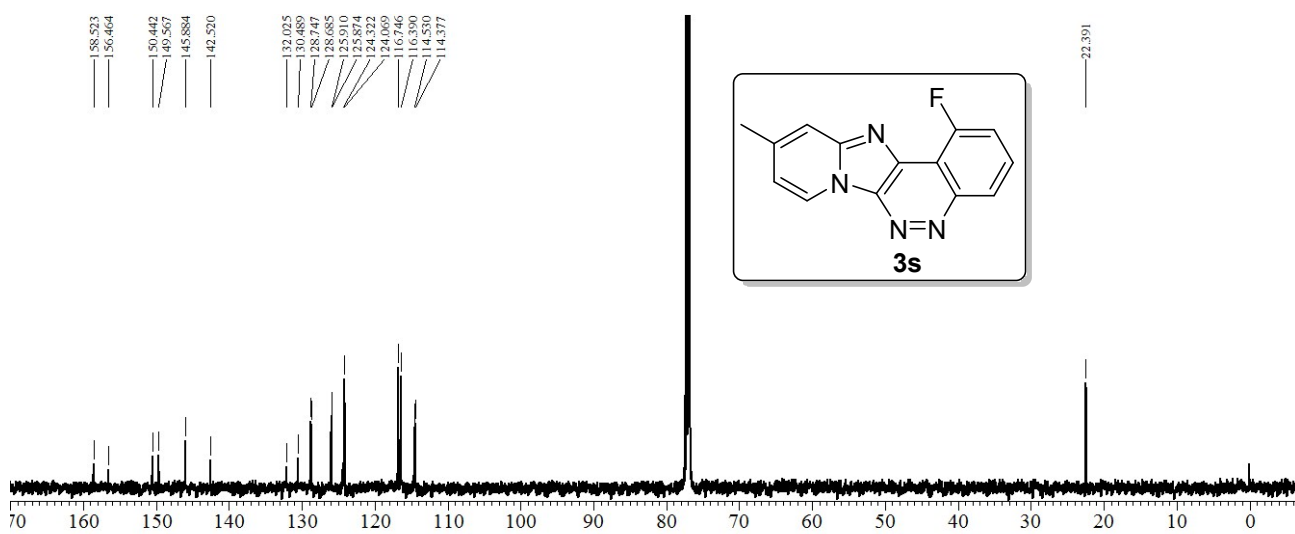

**<sup>13</sup>C NMR of 3s (125 MHz, CDCl<sub>3</sub>)**

III .Copies of  $^1\text{H}$  and  $^{13}\text{C}$  NMR spectra of 4a, 4c, 4f & 4h.

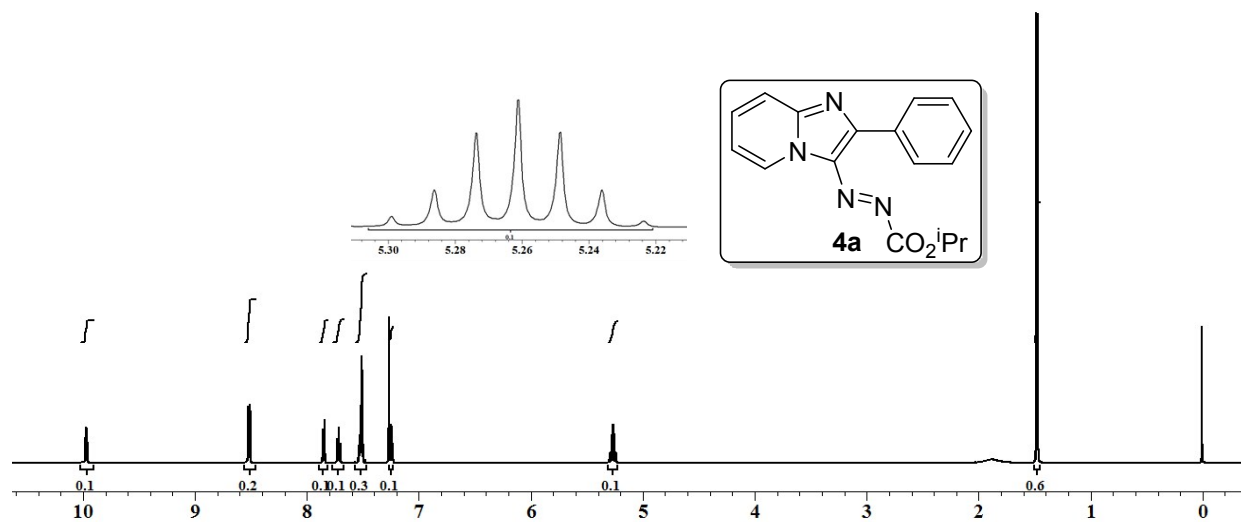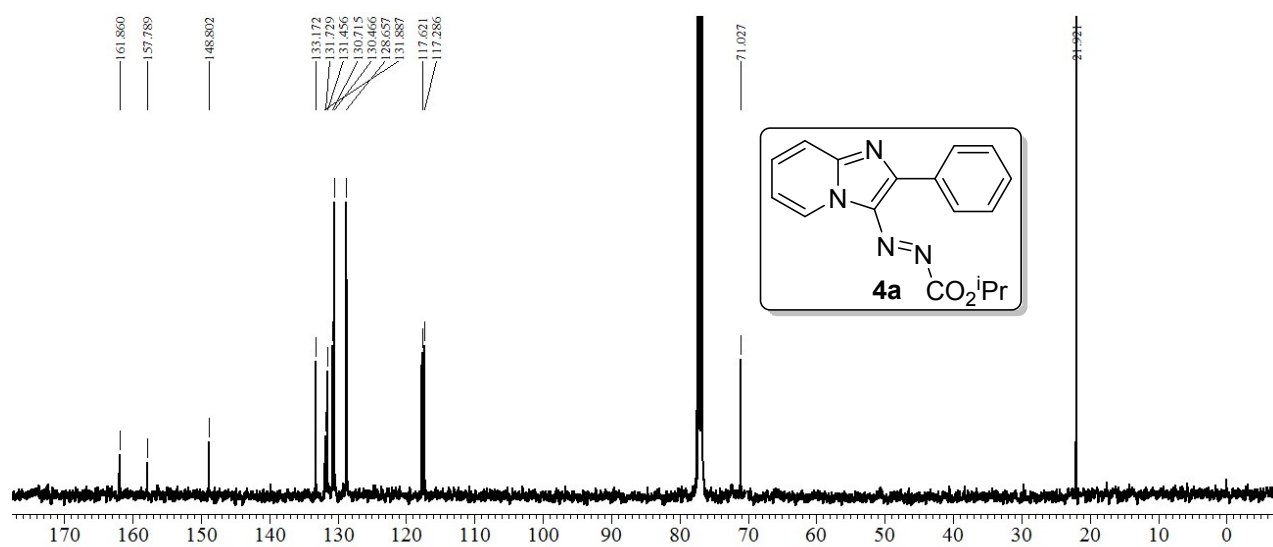



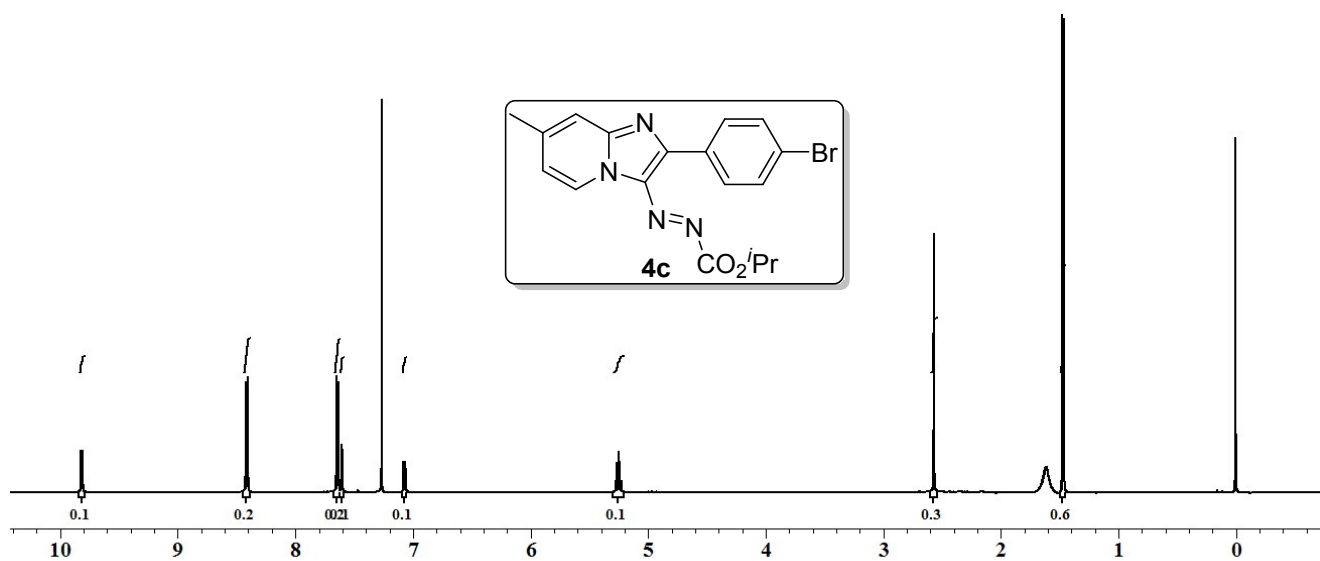

<sup>1</sup>H NMR of 4c (500 MHz, CDCl<sub>3</sub>)

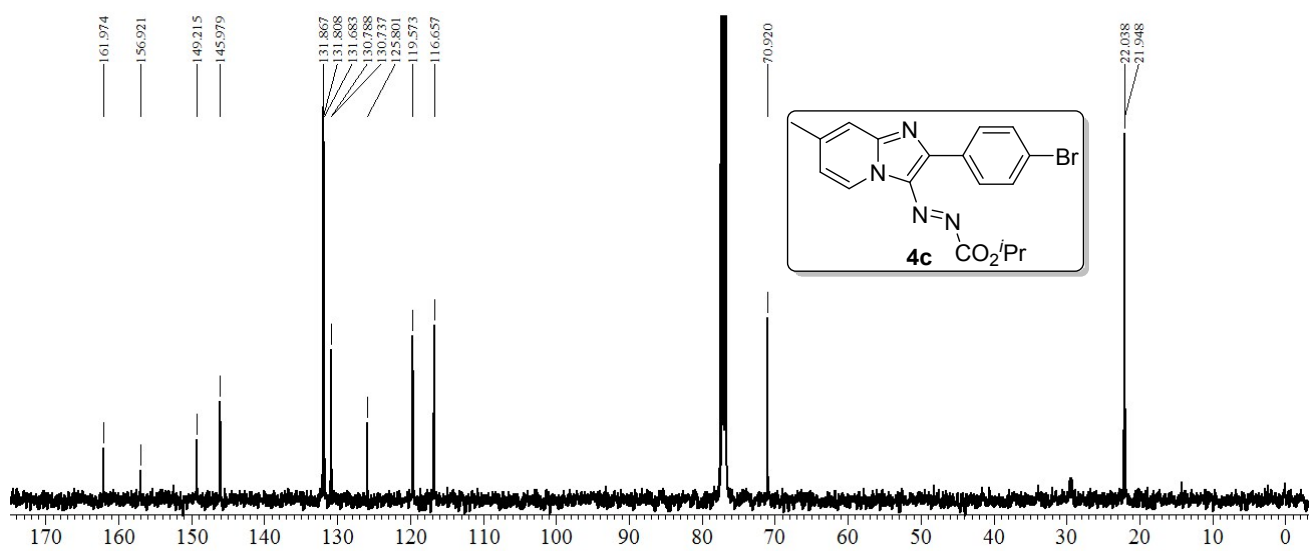

<sup>13</sup>C NMR of 4c (100 MHz, CDCl<sub>3</sub>)

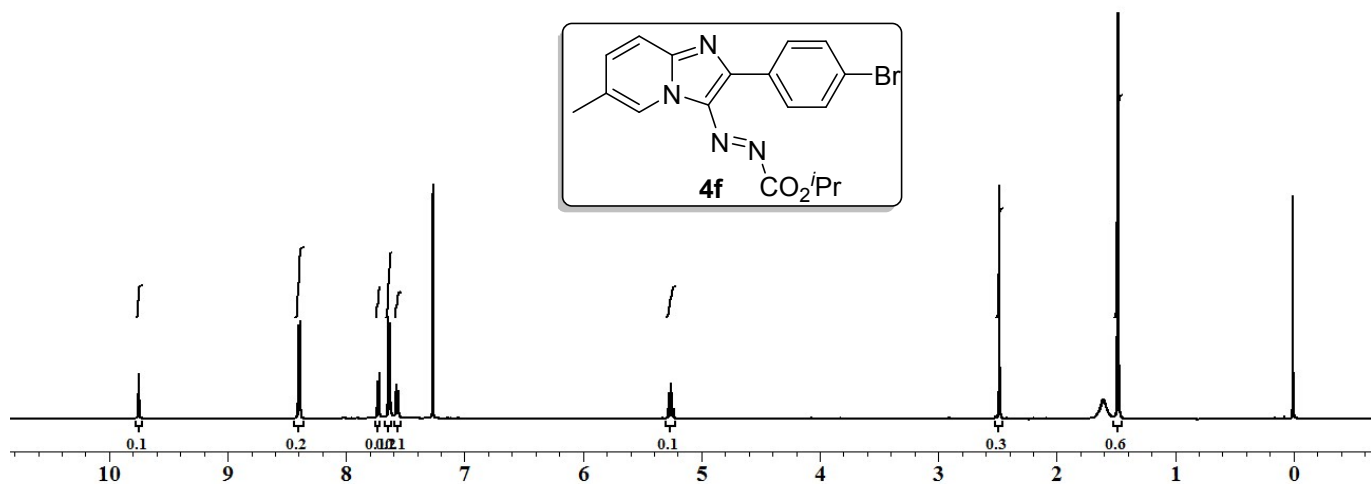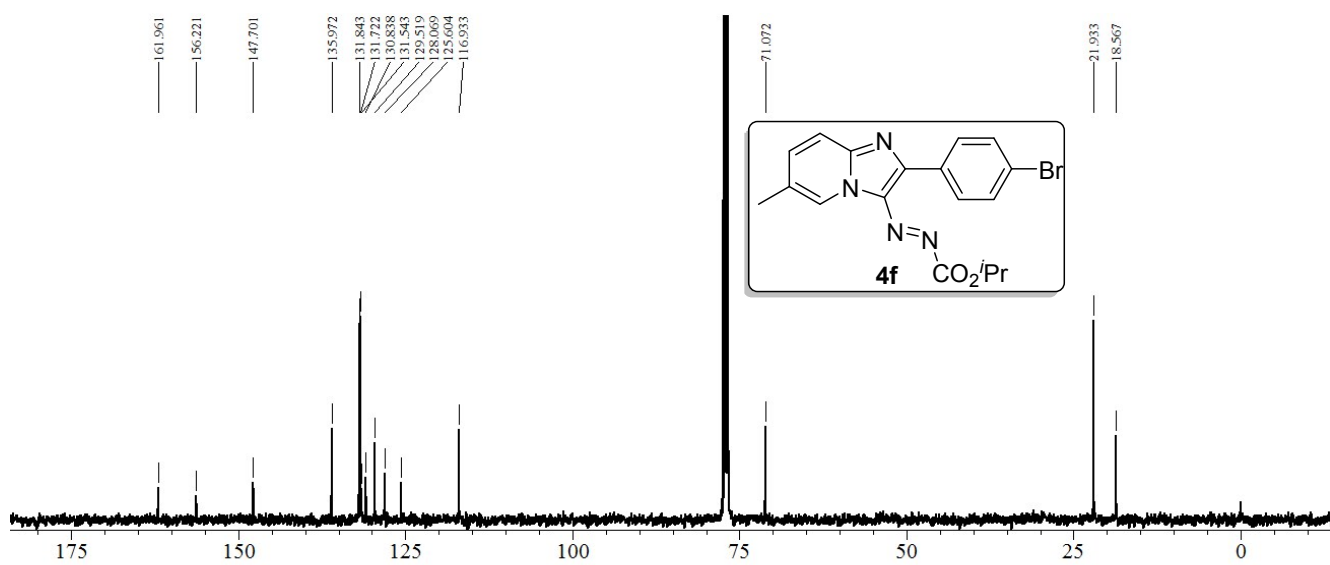

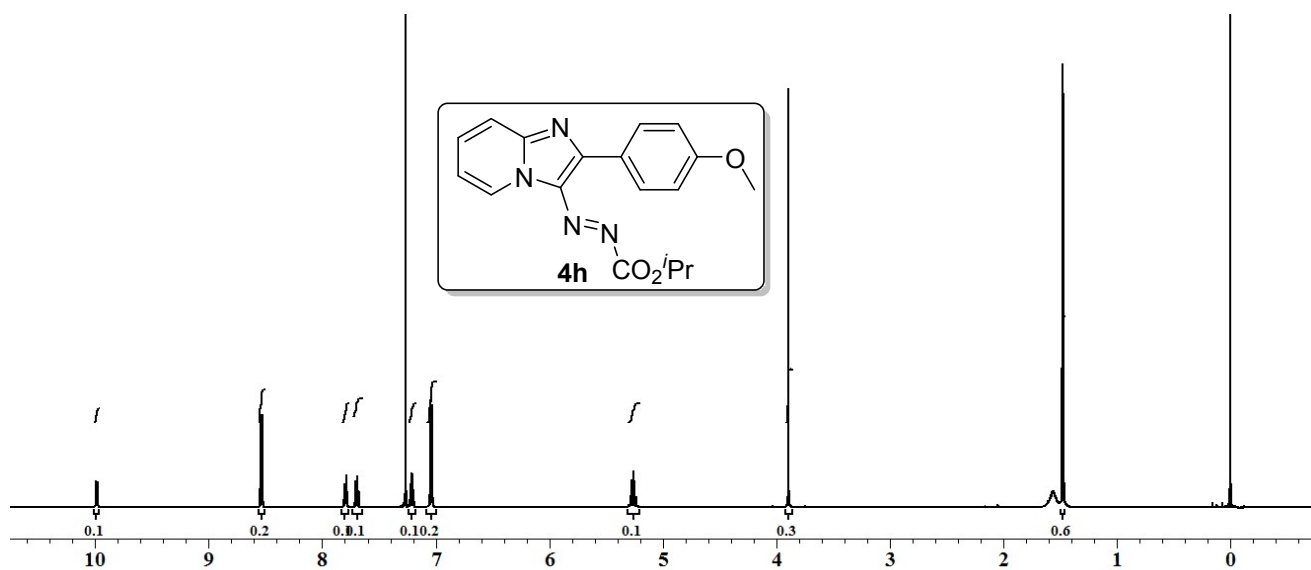

**<sup>1</sup>H NMR of 4h (500 MHz, CDCl<sub>3</sub>)**

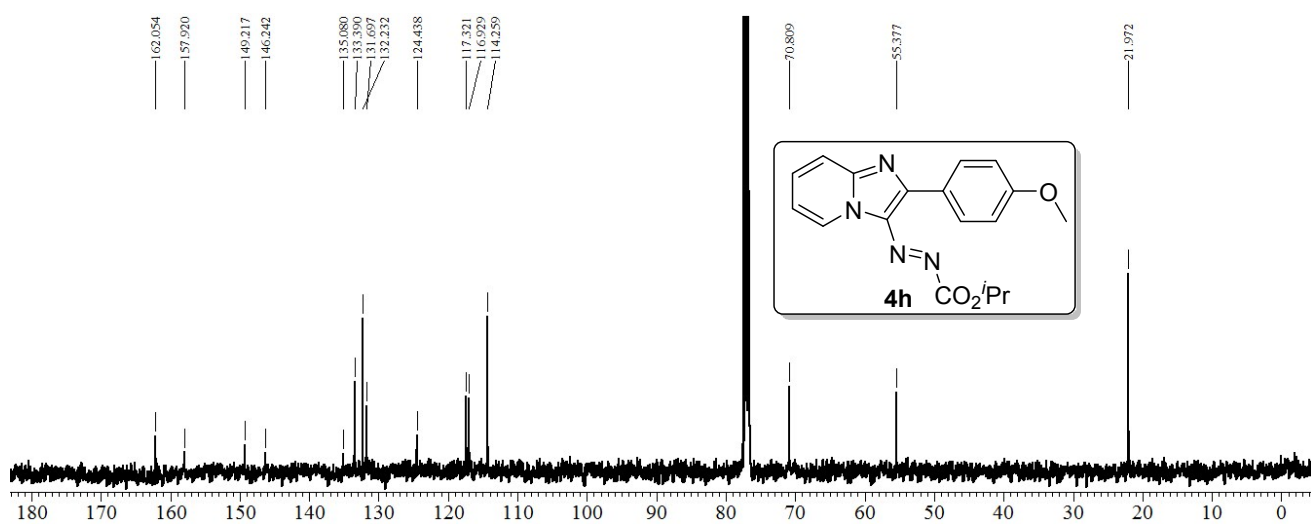

**<sup>13</sup>C NMR of 4h (100 MHz, CDCl<sub>3</sub>)**

IV. Copies of  $^1\text{H}$  and  $^{13}\text{C}$  NMR spectra of scheme2 compounds (1t, 1u, 4t, 4u, 3t & 3u)

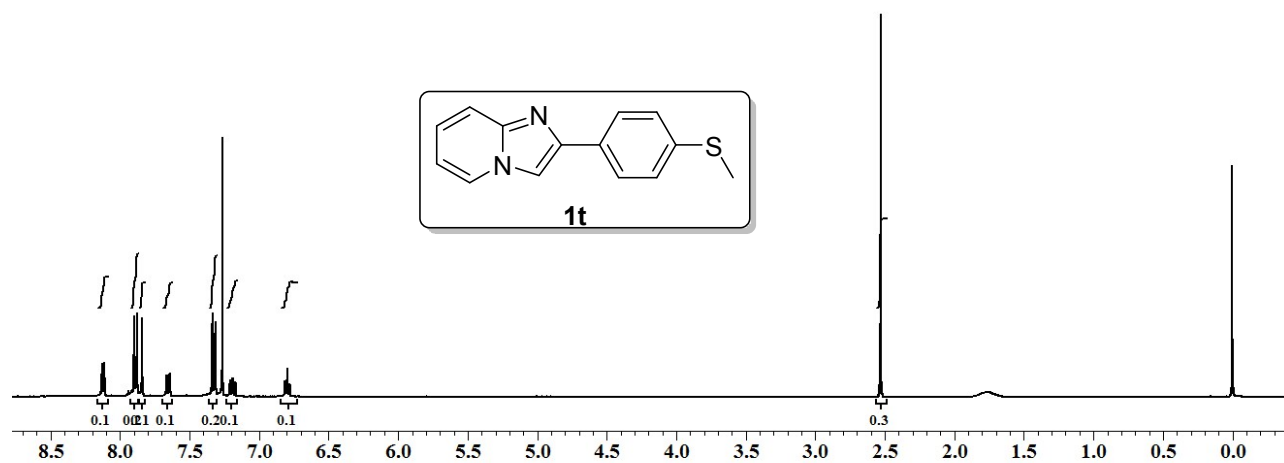

$^1\text{H}$  NMR of 1t (400 MHz,  $\text{CDCl}_3$ )

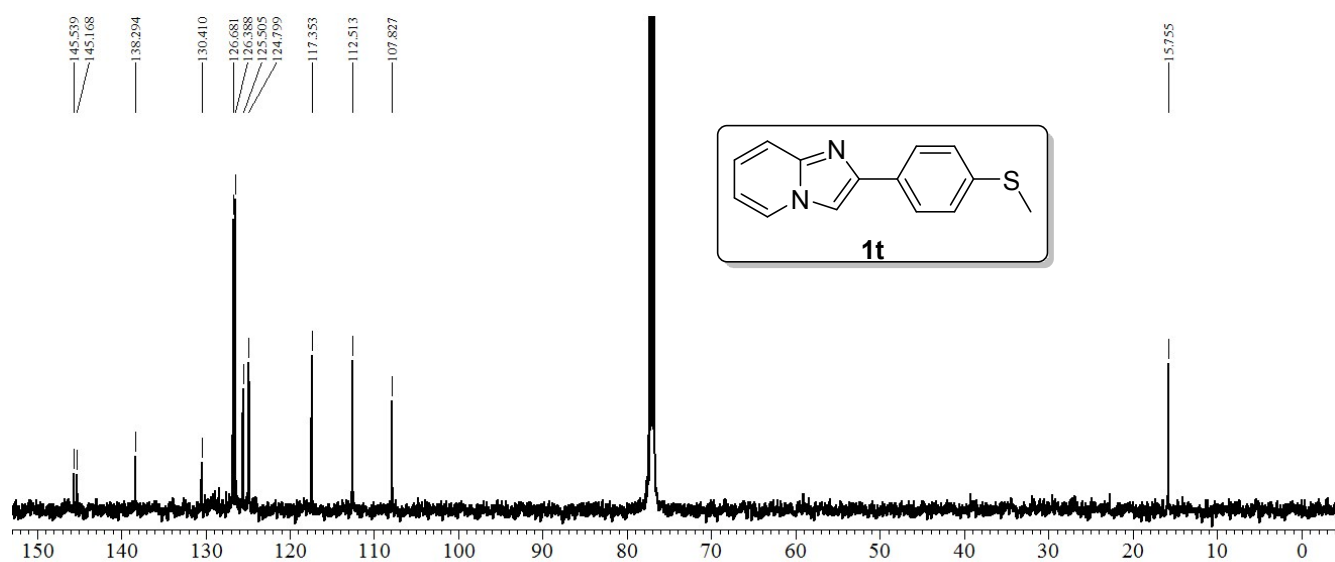

$^{13}\text{C}$  NMR of 1t (125 MHz,  $\text{CDCl}_3$ )

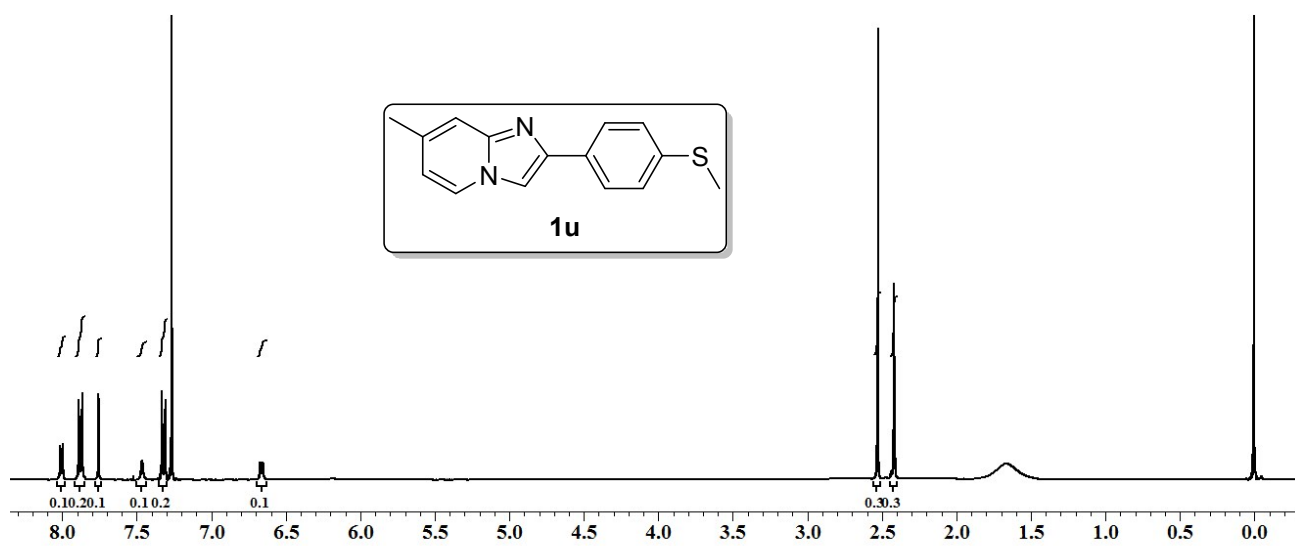

<sup>1</sup>H NMR of **1u** (400 MHz, CDCl<sub>3</sub>)

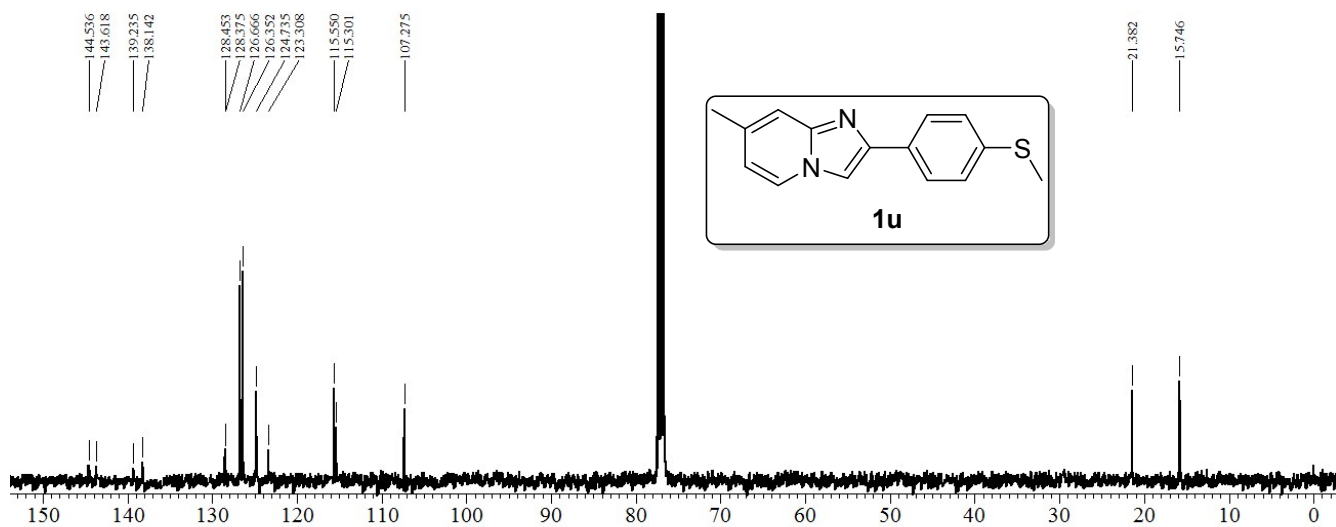

<sup>13</sup>C NMR of **1u** (125 MHz, CDCl<sub>3</sub>)

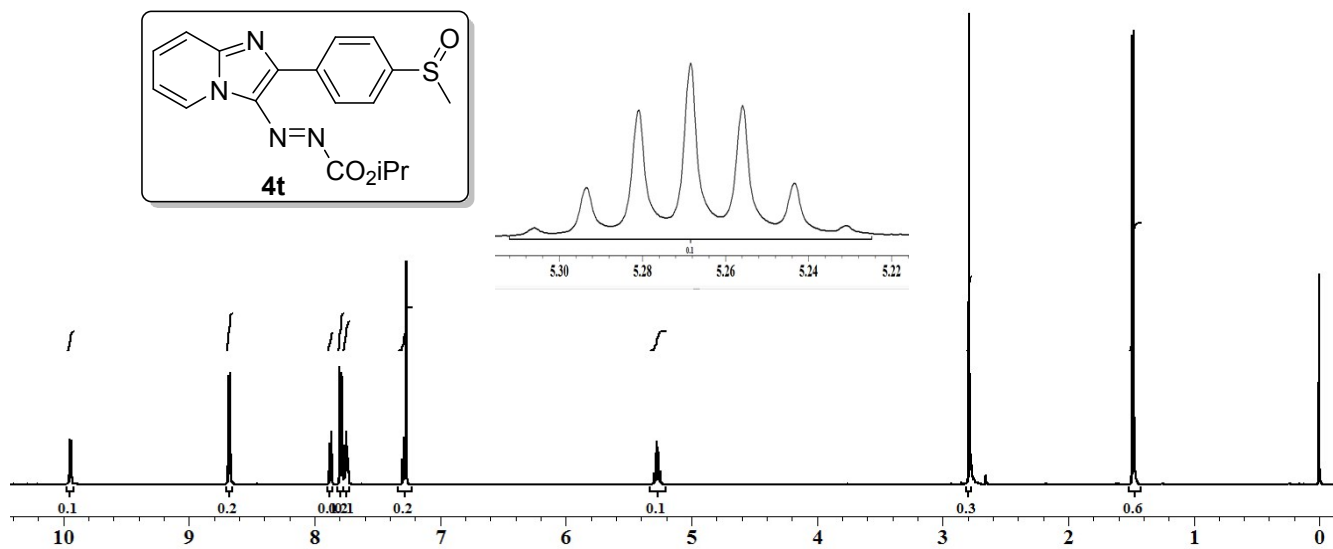

<sup>1</sup>H NMR of **4t** (500 MHz, CDCl<sub>3</sub>)

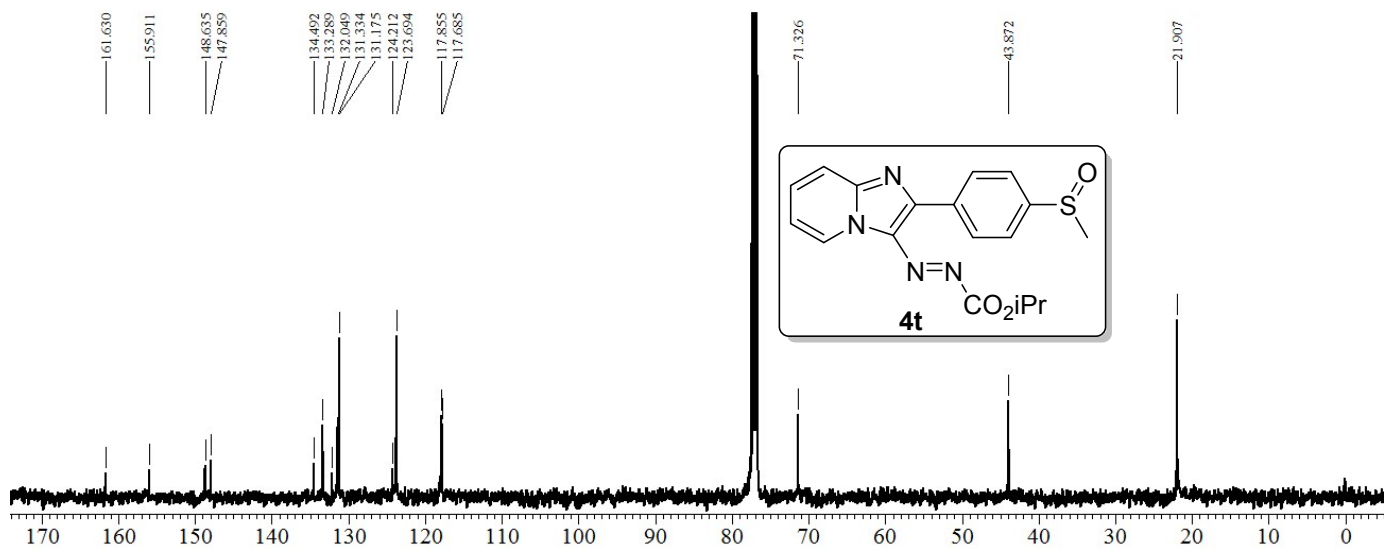

<sup>13</sup>C NMR of **4t** (100 MHz, CDCl<sub>3</sub>)

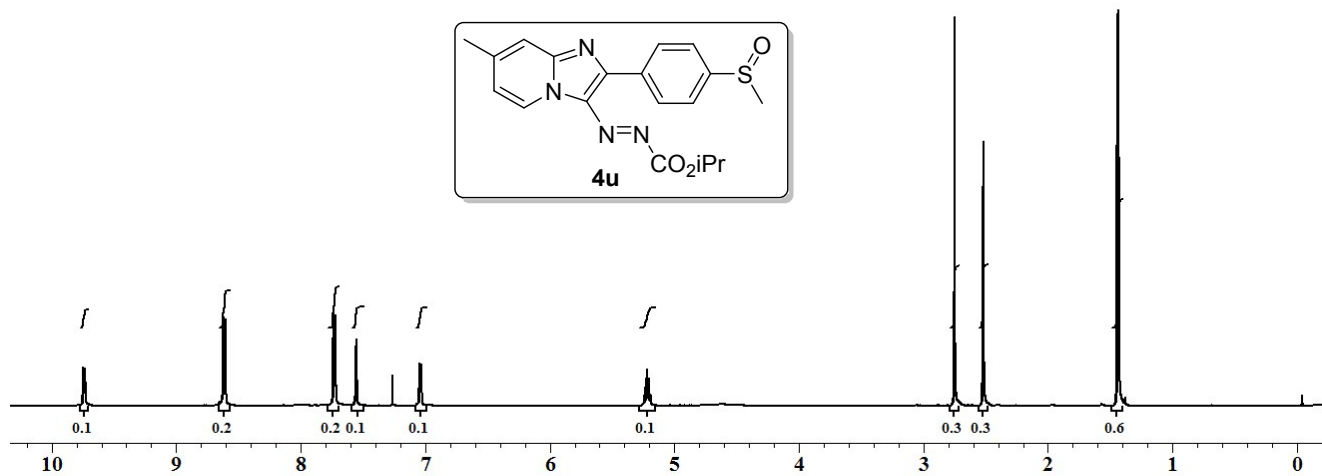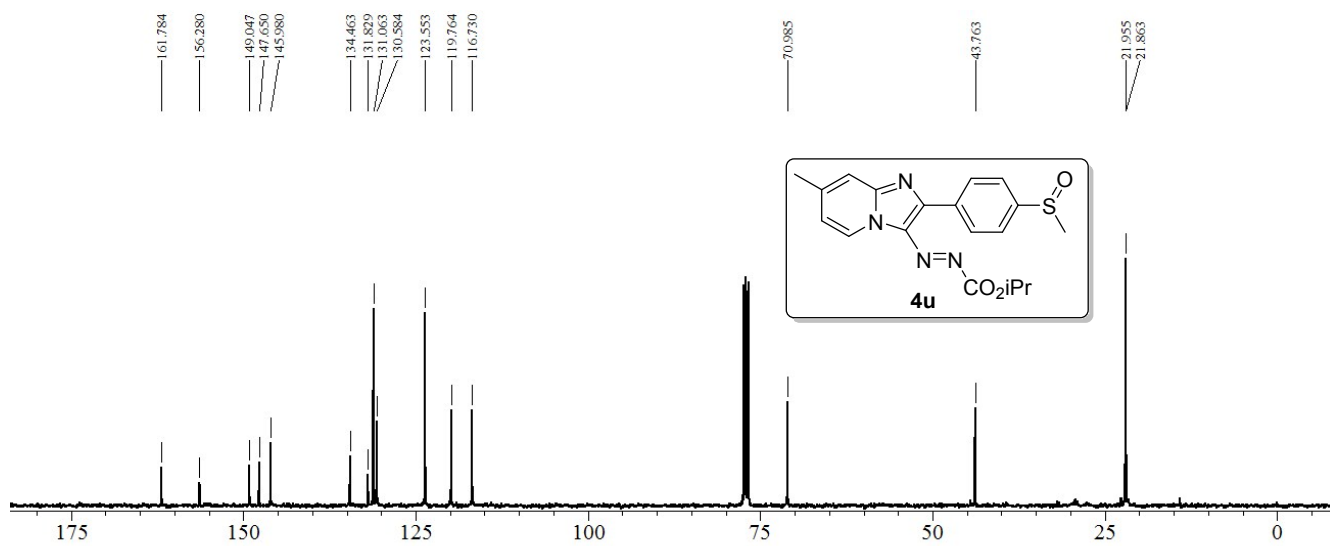

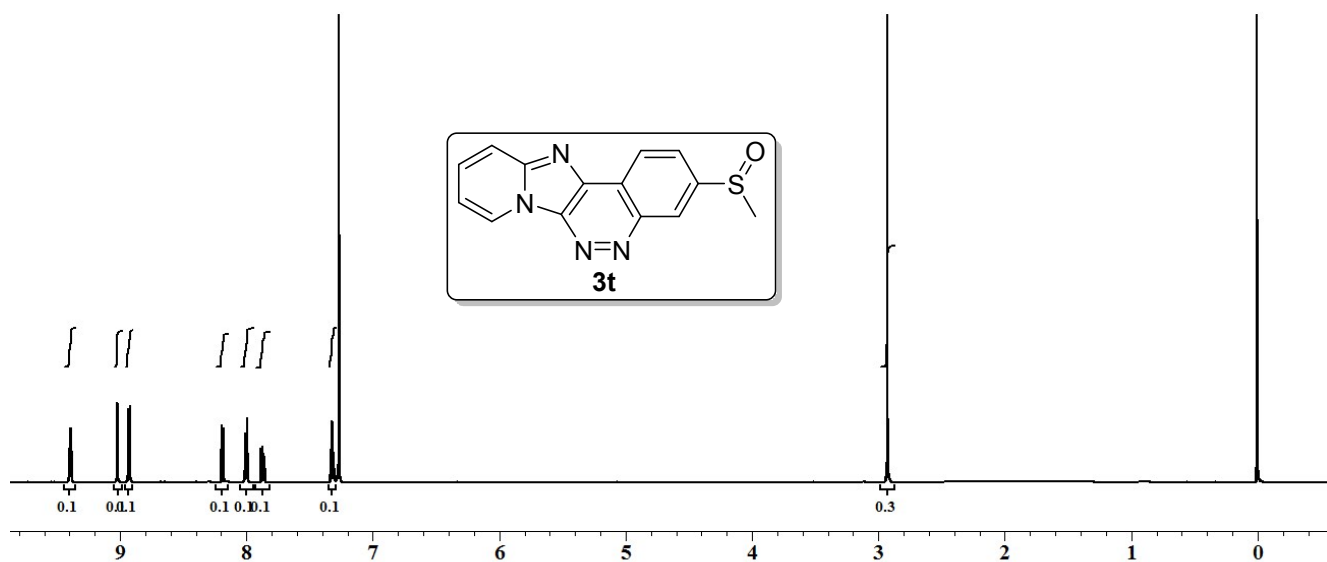

<sup>1</sup>H NMR of **3t** (500 MHz, CDCl<sub>3</sub>)

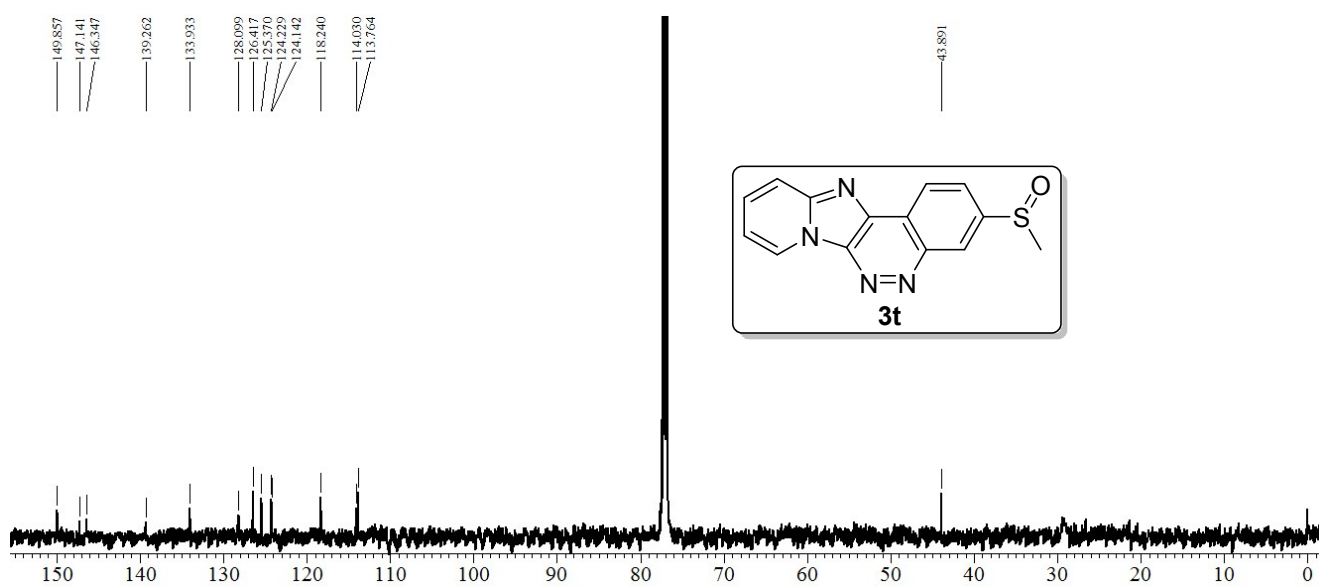

<sup>13</sup>C NMR of **3t** (100 MHz, CDCl<sub>3</sub>)



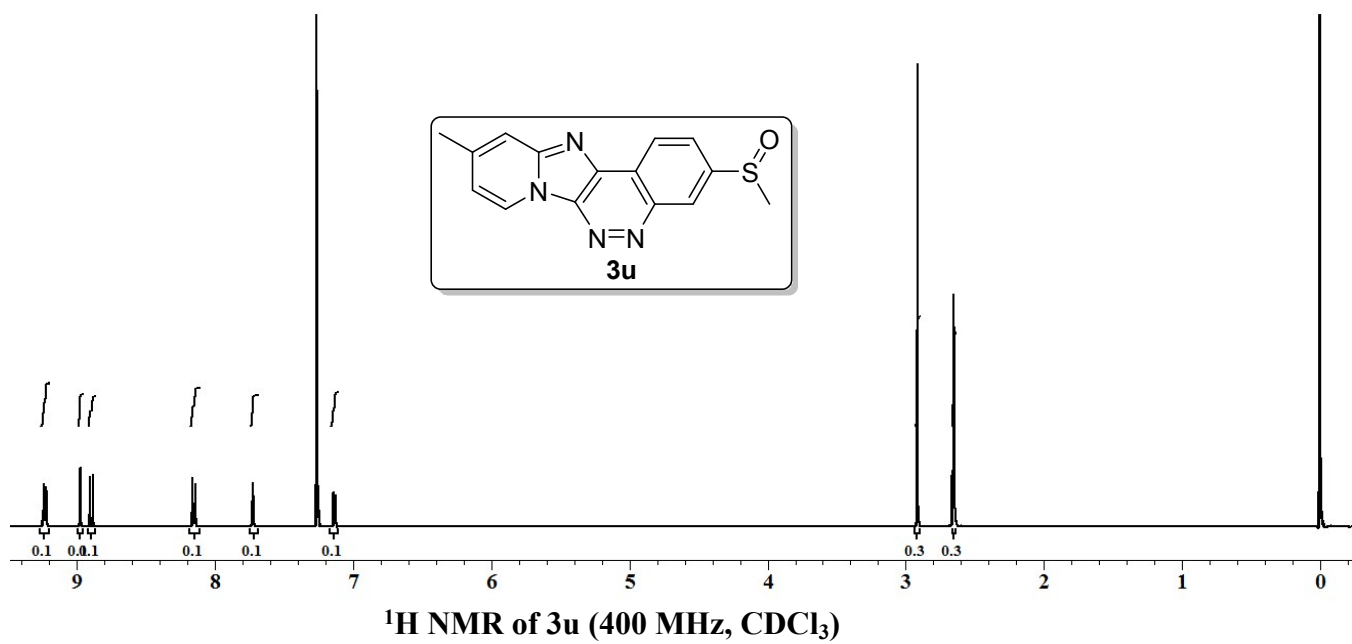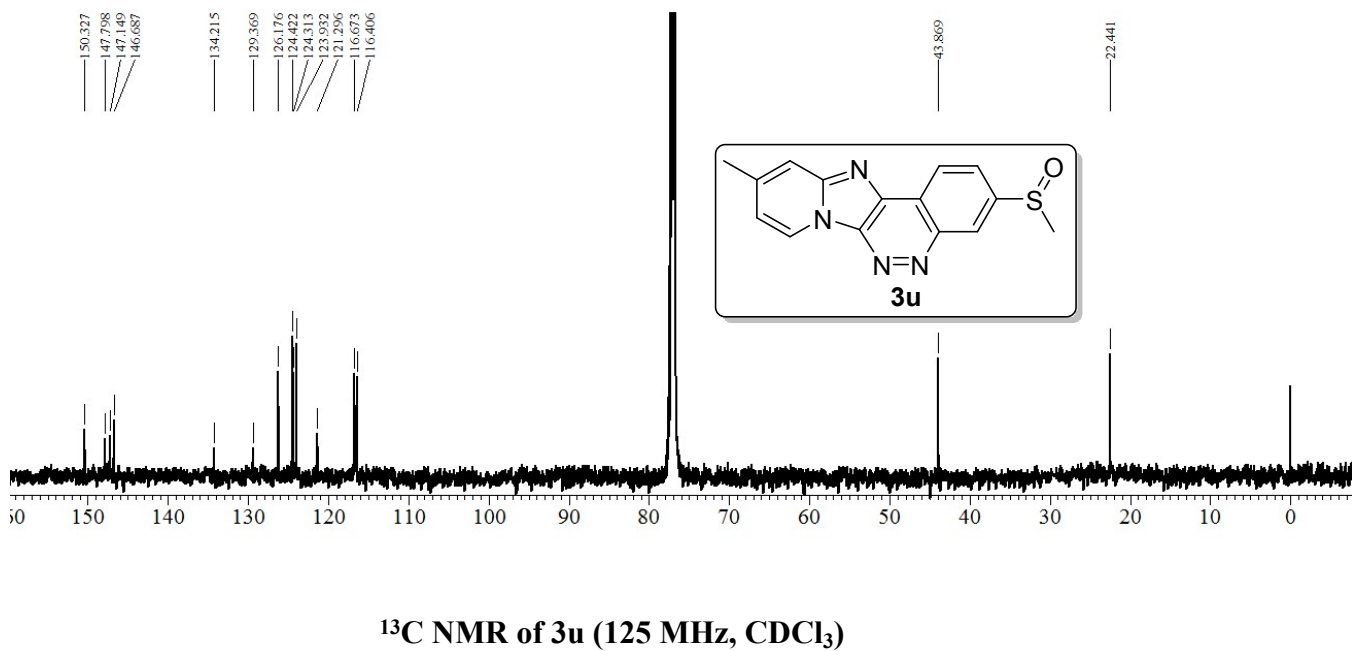

## V. Copies of $^1\text{H}$ and $^{13}\text{C}$ NMR spectra of 5a-5e

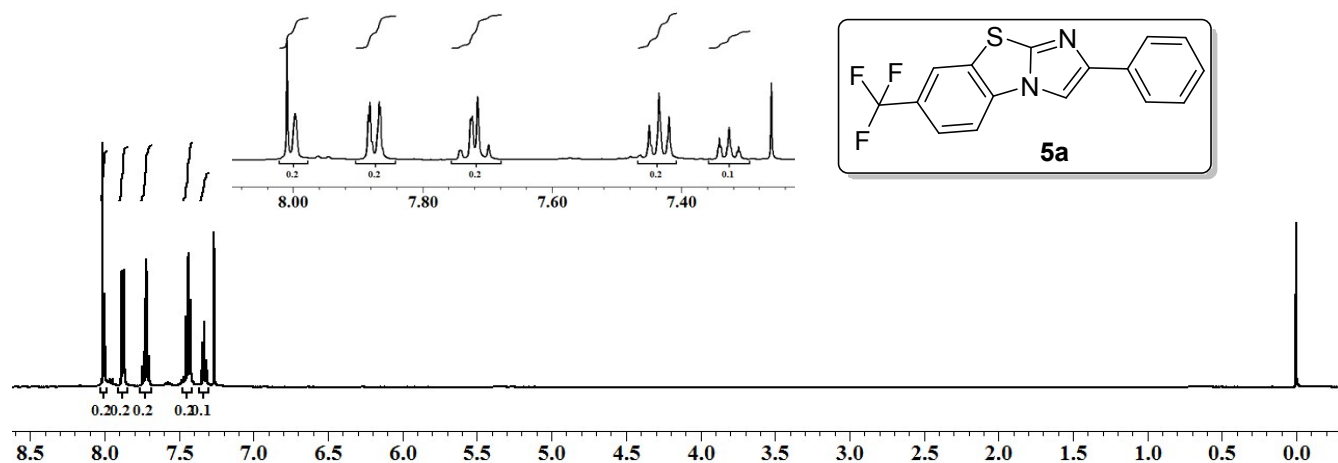

$^1\text{H}$  NMR of 5a (500 MHz,  $\text{CDCl}_3$ )

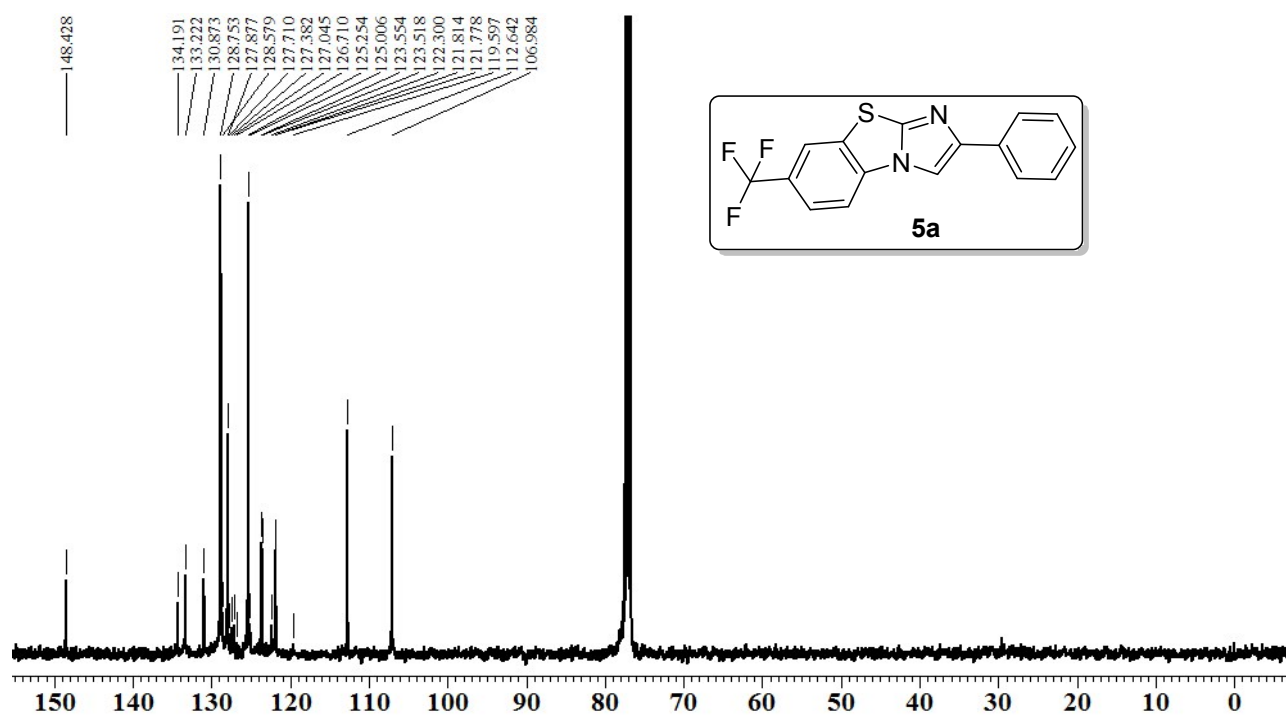

$^{13}\text{C}$  NMR of 5a (100 MHz,  $\text{CDCl}_3$ )

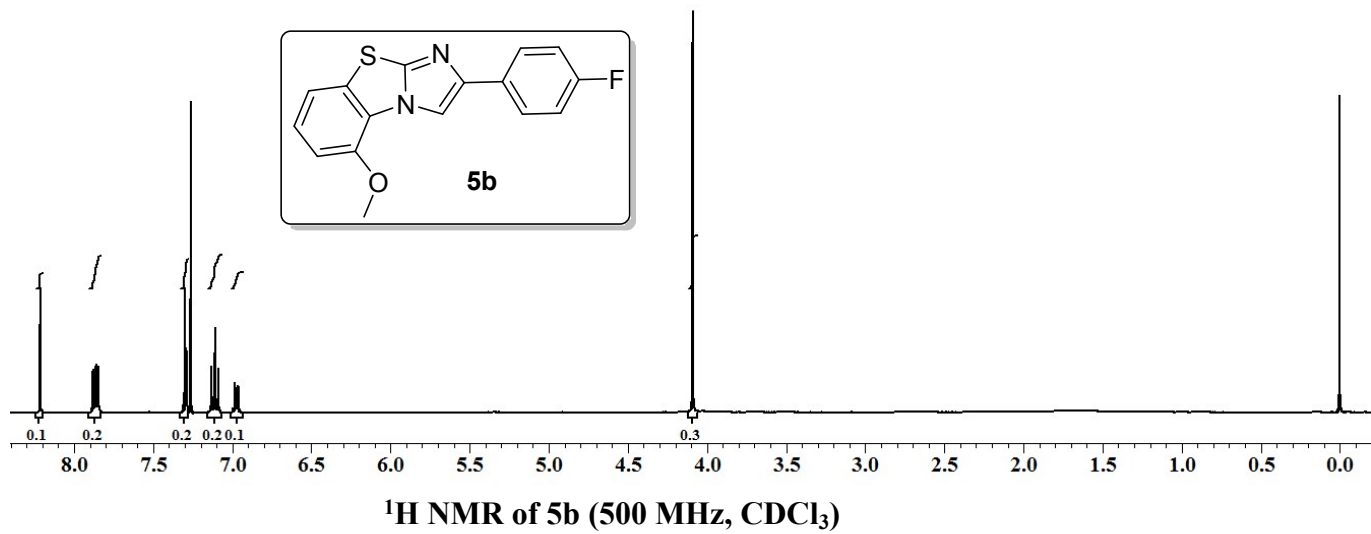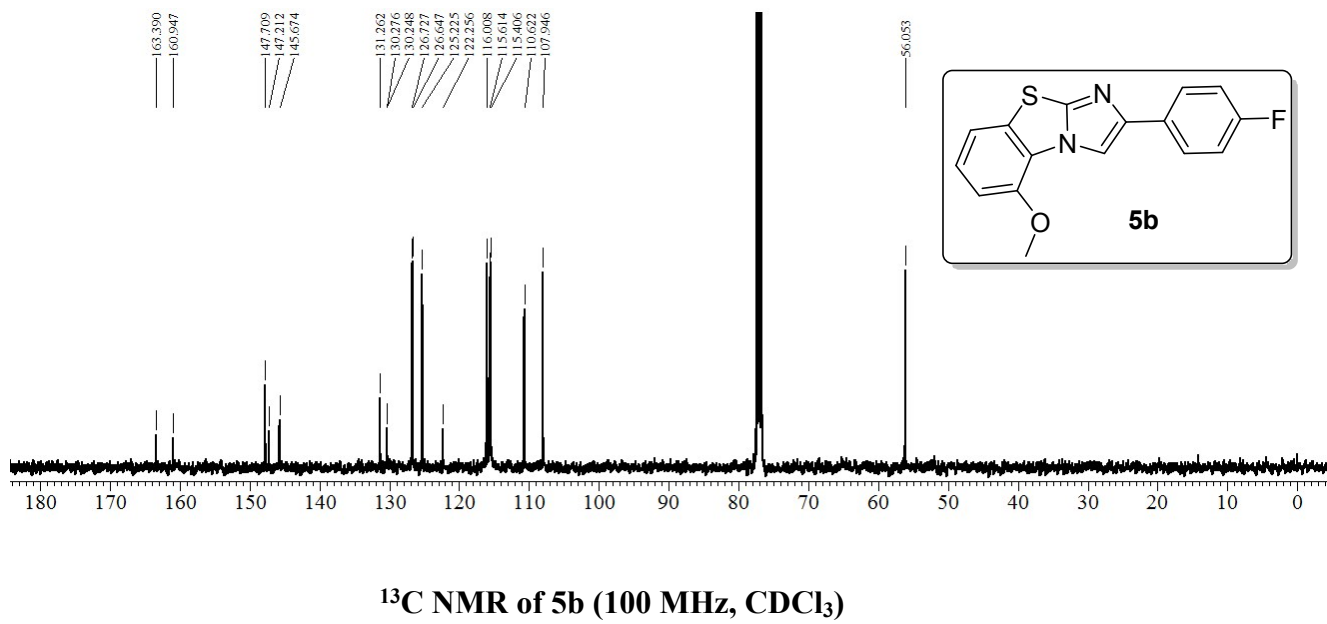

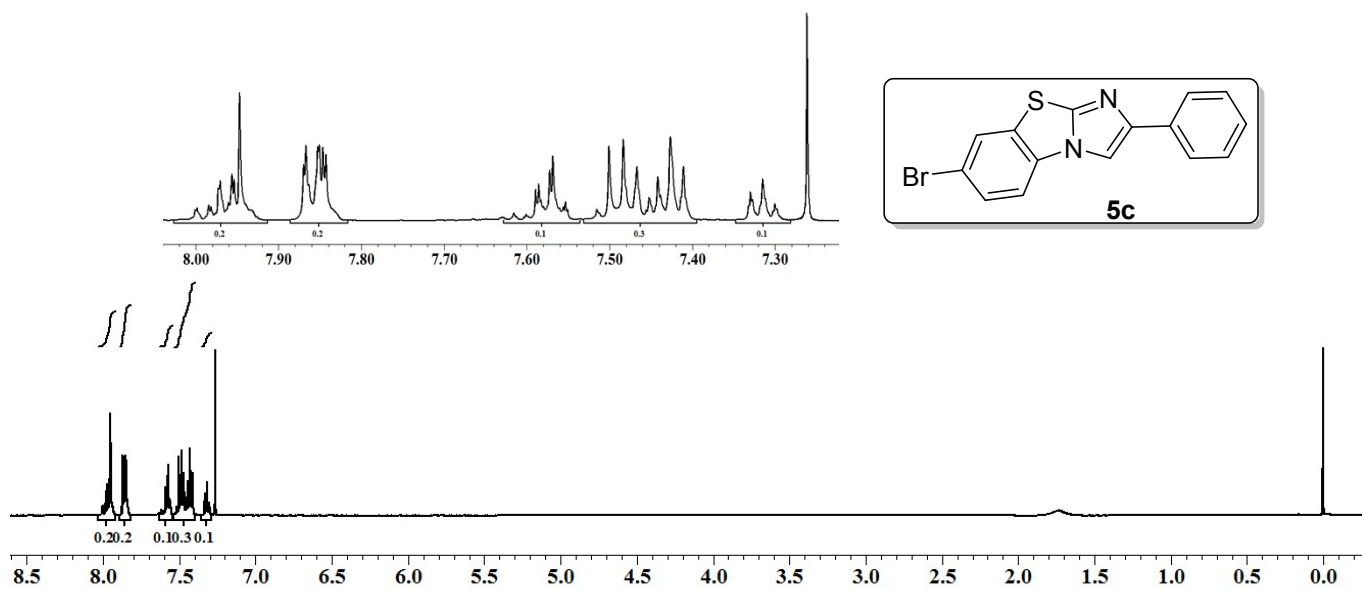

<sup>1</sup>H NMR of **5c** (500 MHz, CDCl<sub>3</sub>)

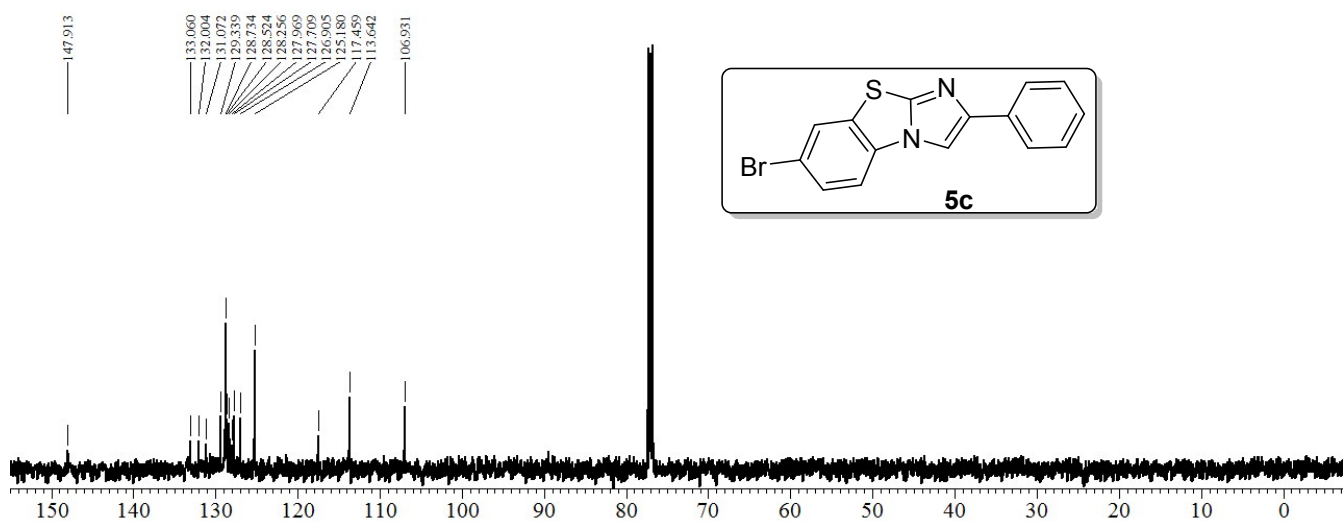

<sup>13</sup>C NMR of **5c** (125 MHz, CDCl<sub>3</sub>)

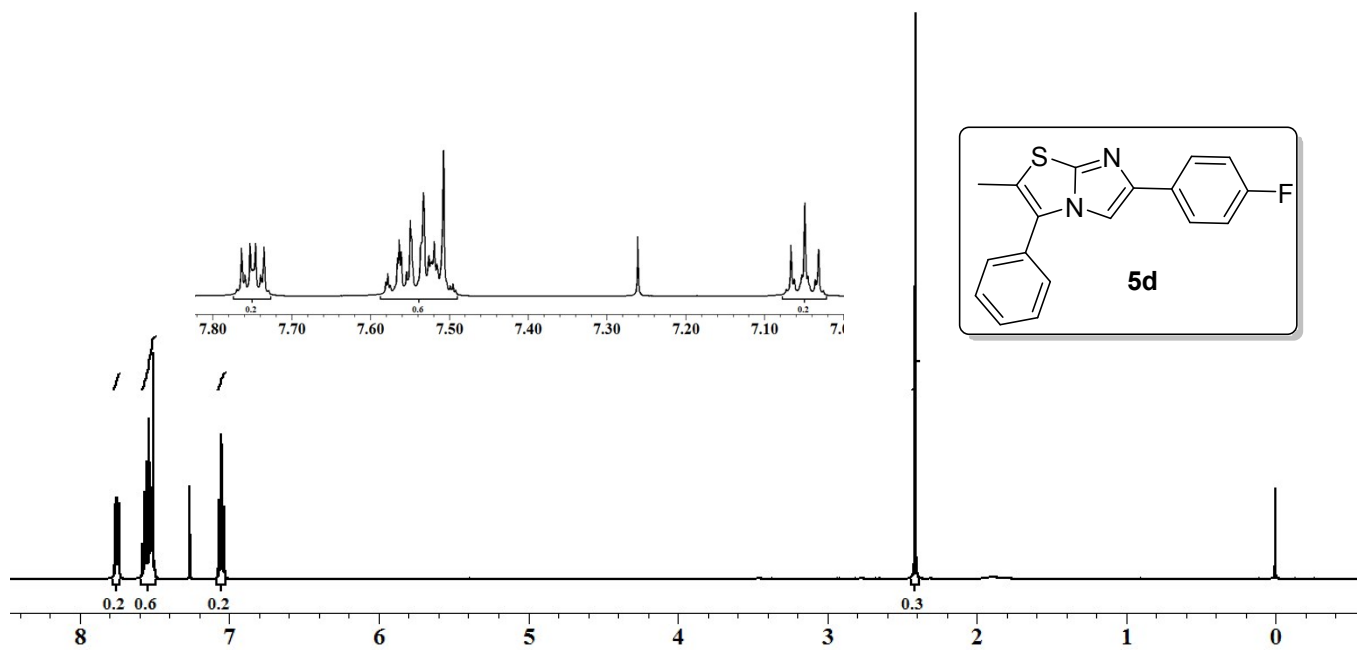

<sup>1</sup>H NMR of 5d (500 MHz, CDCl<sub>3</sub>)

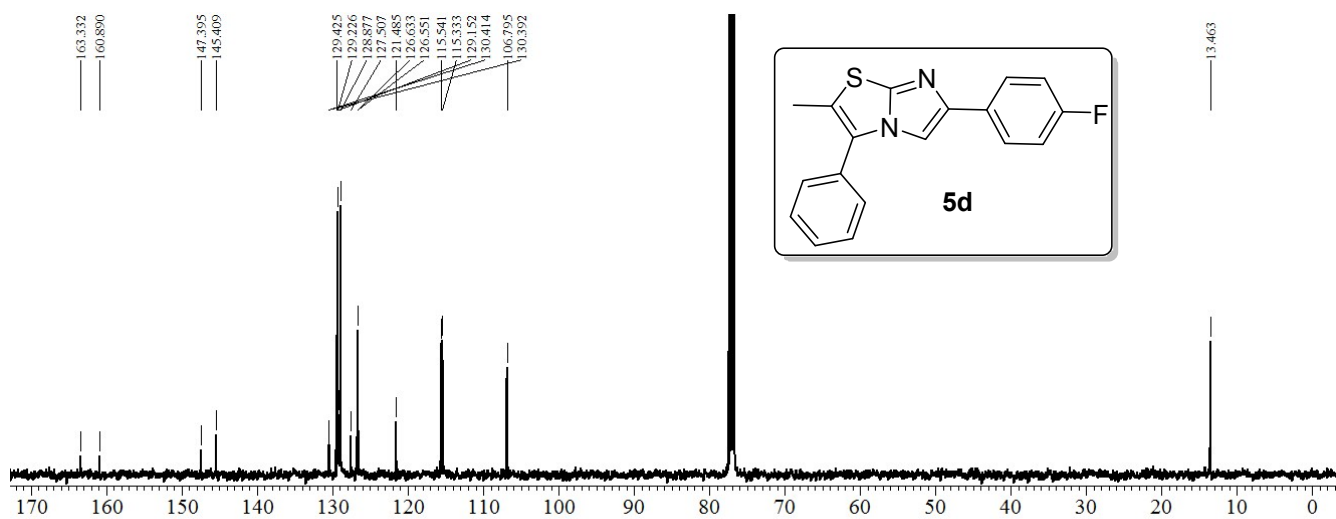

<sup>13</sup>C NMR of 5d (100 MHz, CDCl<sub>3</sub>)

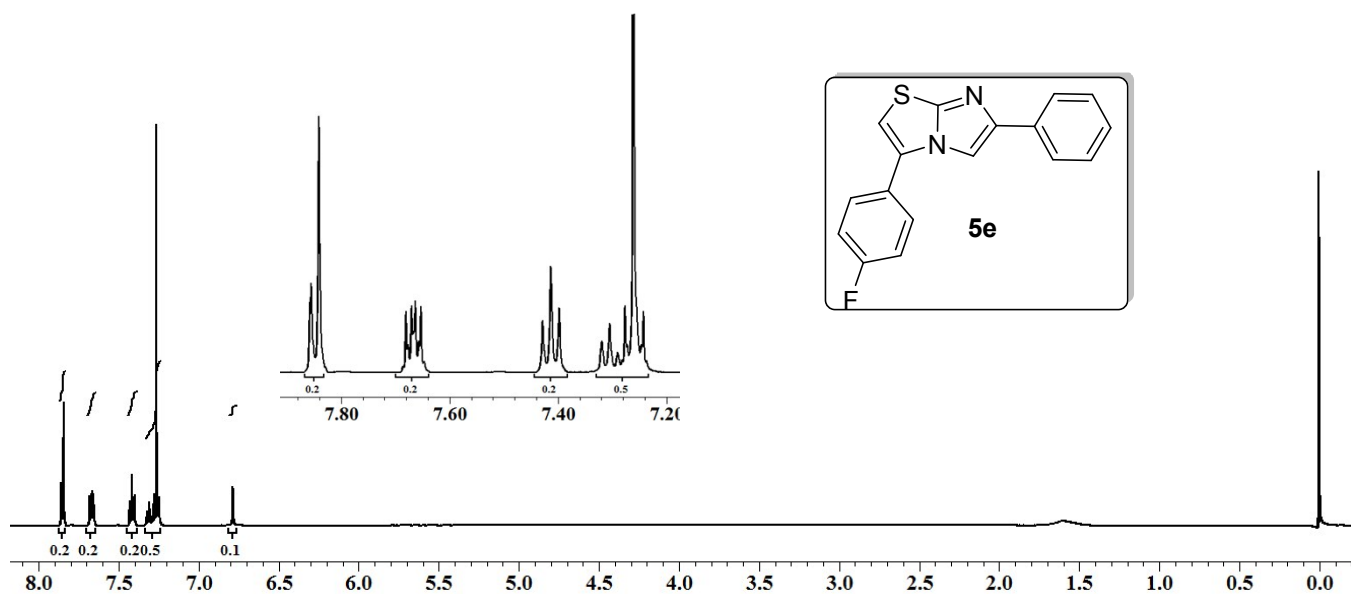

$^1\text{H}$  NMR of 5e (500 MHz,  $\text{CDCl}_3$ )

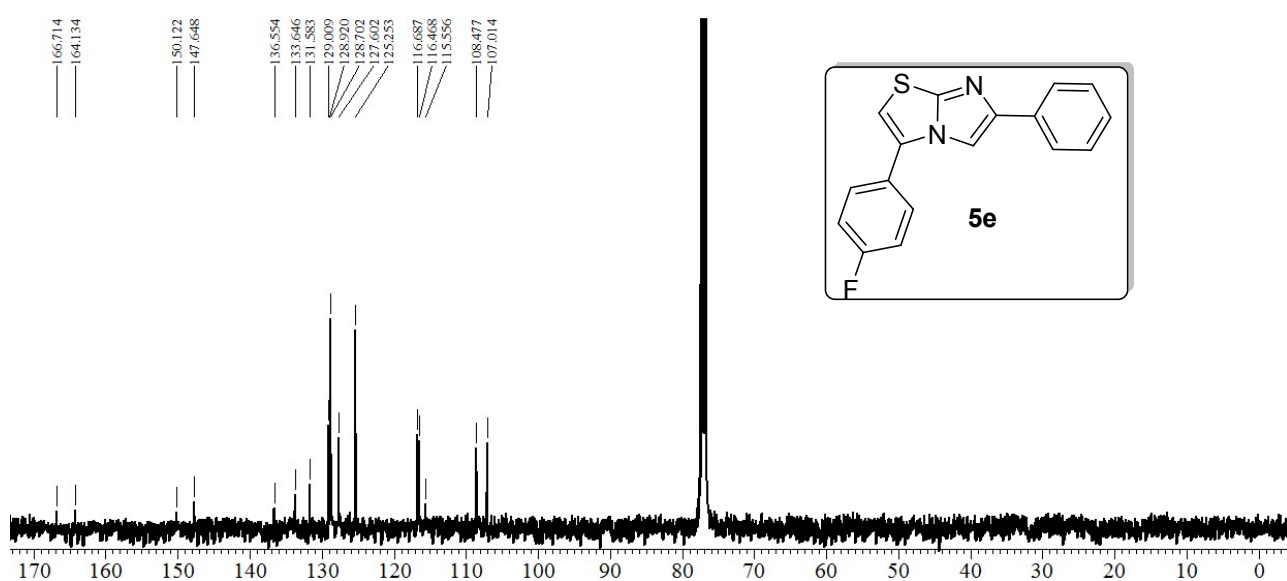

$^{13}\text{C}$  NMR of 5e (100 MHz,  $\text{CDCl}_3$ )



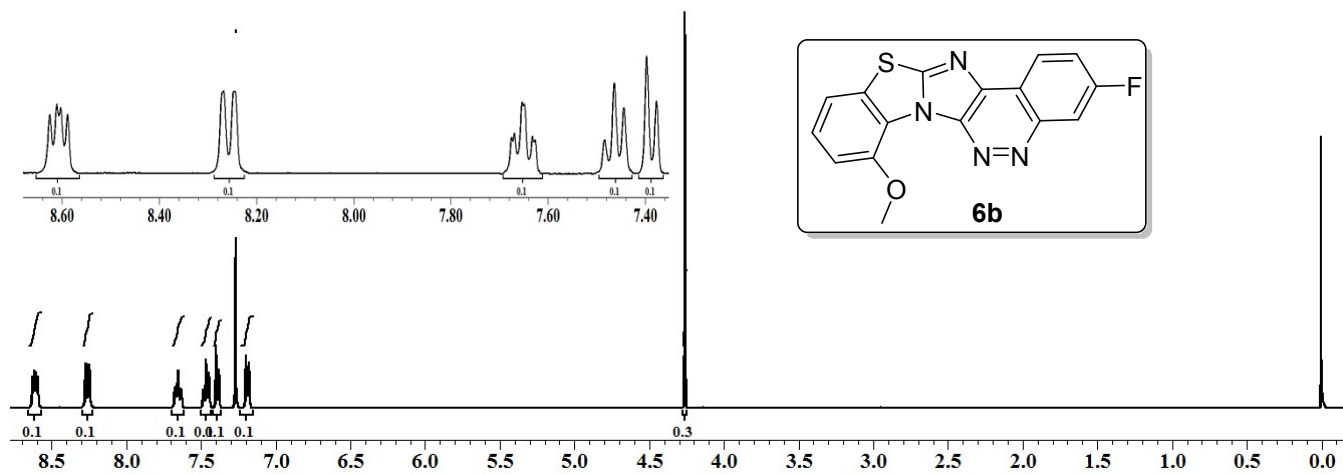

<sup>1</sup>H NMR of **6b** (400 MHz, CDCl<sub>3</sub>)

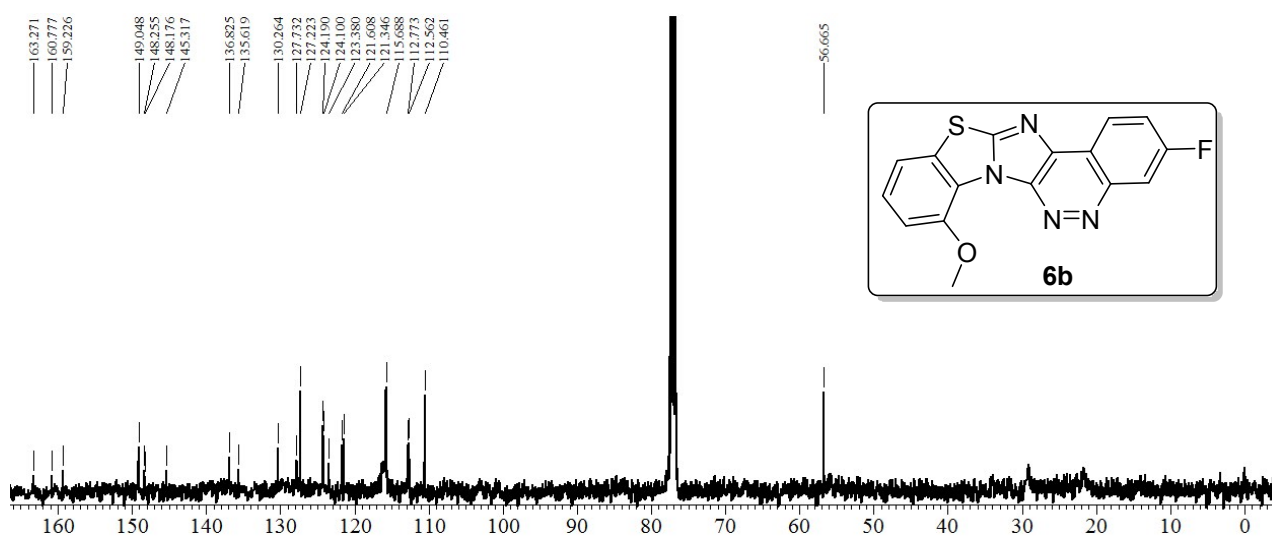

<sup>13</sup>C NMR of **6b** (100 MHz, CDCl<sub>3</sub>)



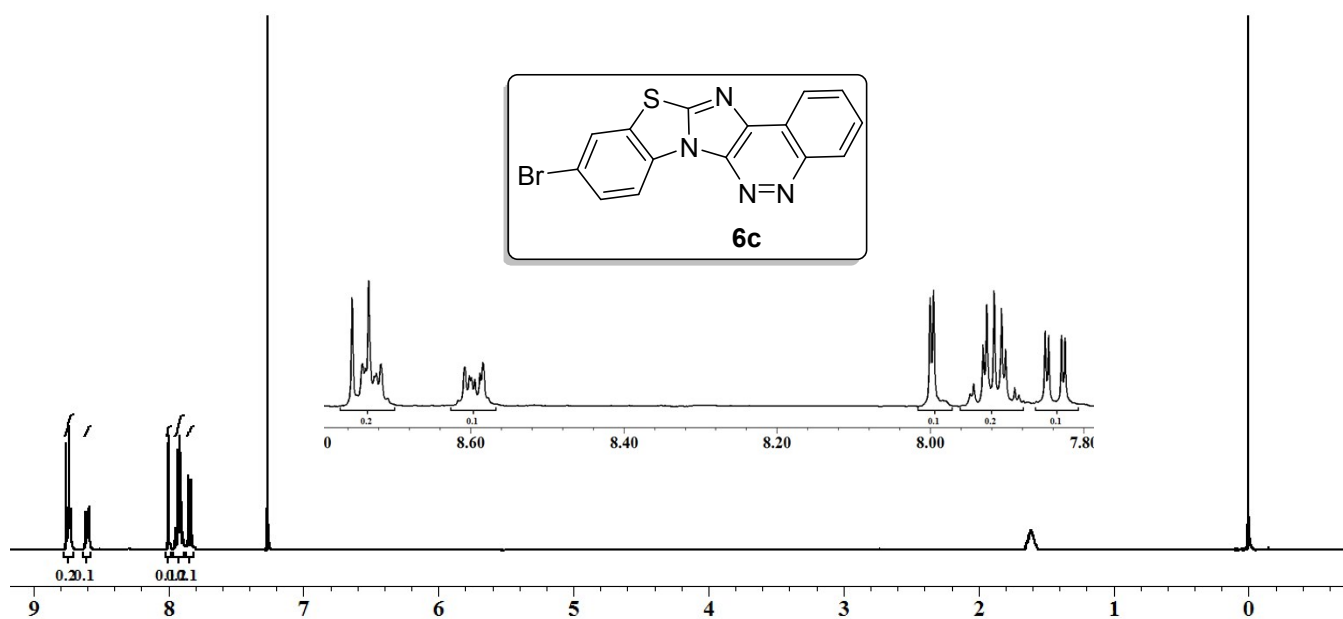

$^1\text{H}$  NMR of **6c** (400 MHz,  $\text{CDCl}_3$ )

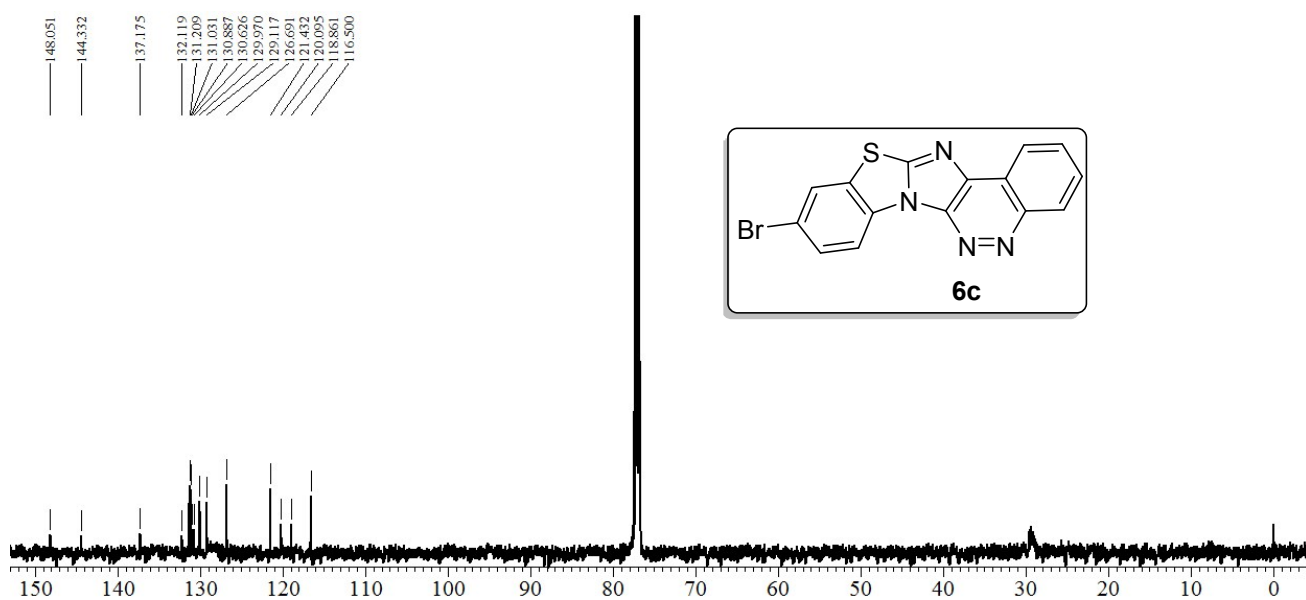

$^{13}\text{C}$  NMR of **6c** (125 MHz,  $\text{CDCl}_3$ )

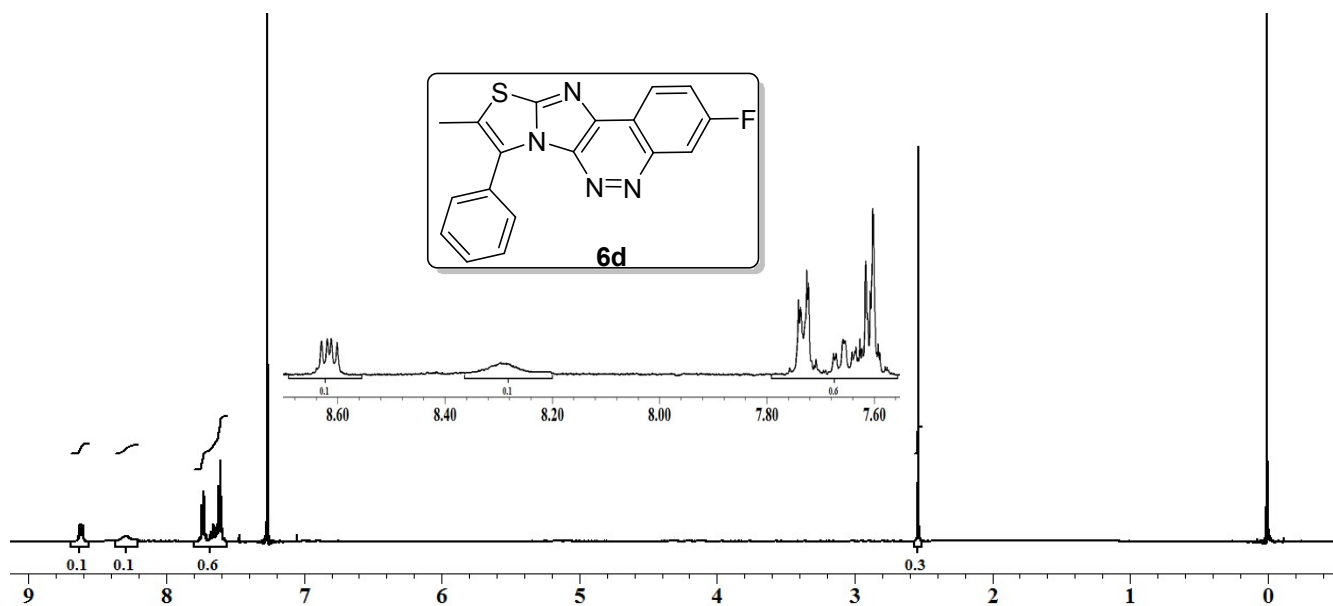

<sup>1</sup>H NMR of **6d** (500 MHz, CDCl<sub>3</sub>)

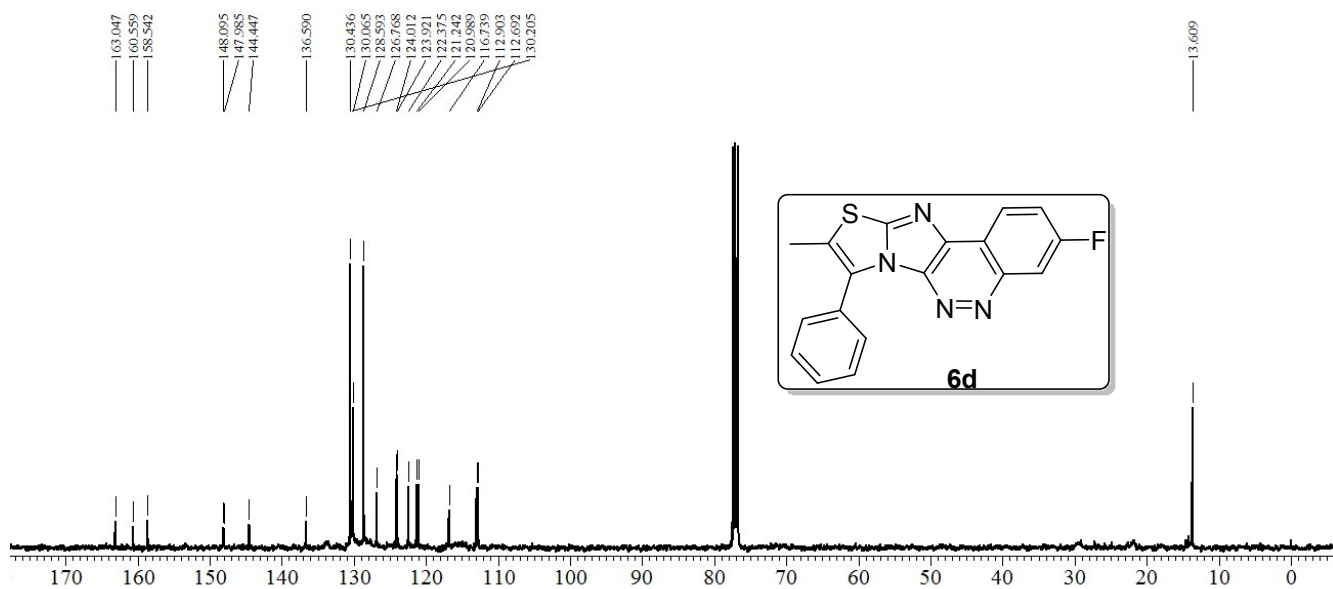

<sup>13</sup>C NMR of **6d** (100 MHz, CDCl<sub>3</sub>)

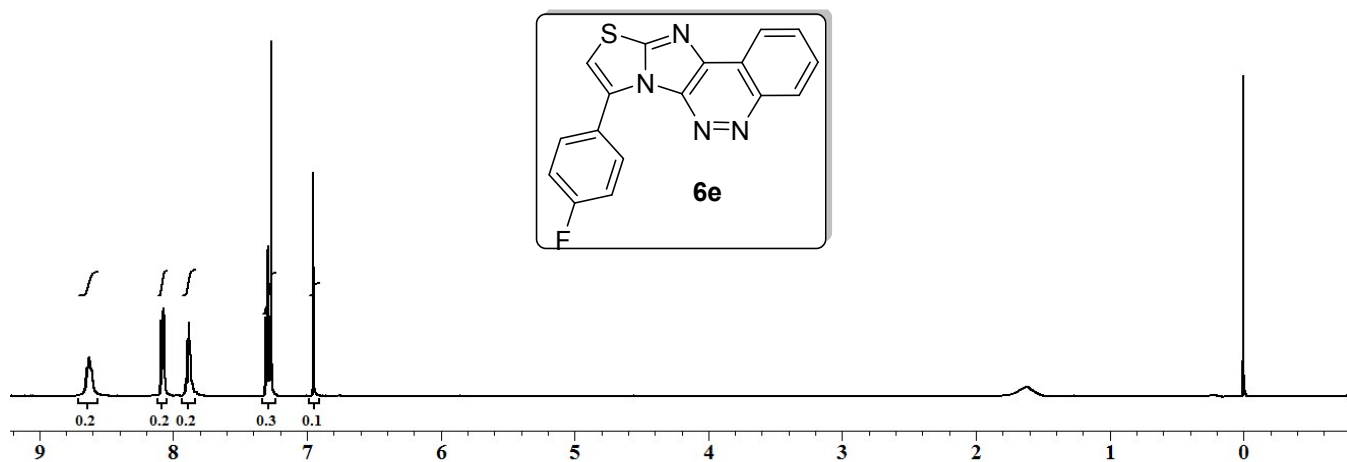

<sup>1</sup>H NMR of **6e** (500 MHz, CDCl<sub>3</sub>)

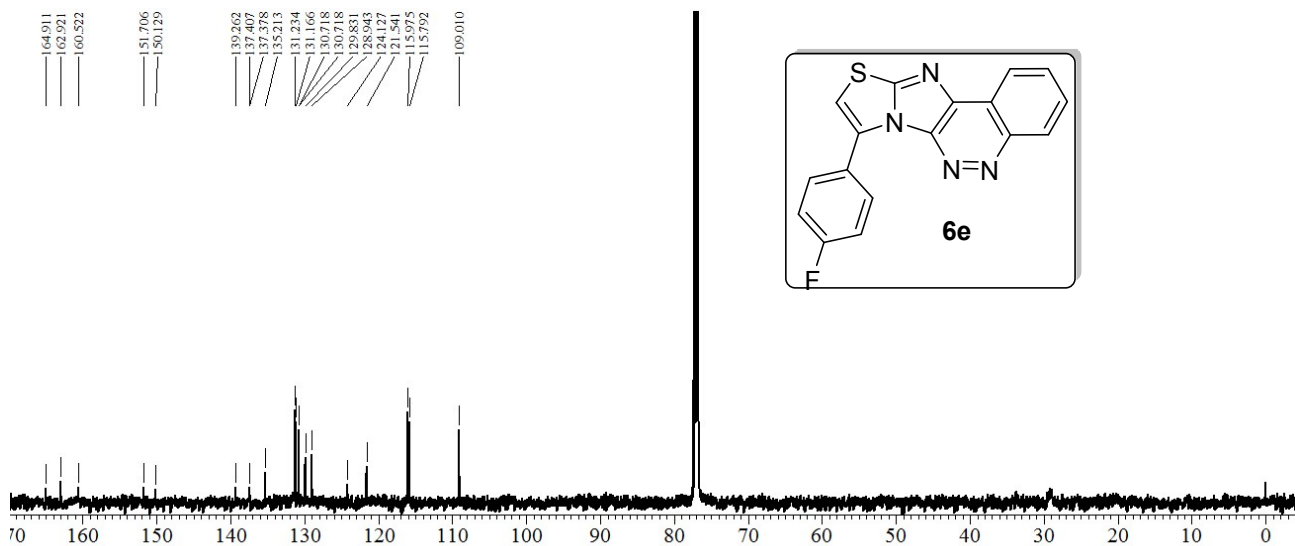

<sup>13</sup>C NMR of **6e** (125 MHz, CDCl<sub>3</sub>)
